# Supplementary material for: Phytoconstituent Profiles Associated with Relevant Antioxidant Potential and Variable Nutritive Effects of the Olive, Sweet Almond, and Black Mulberry Gemmotherapy Extracts
Source: MDPI journal article supplement (doi:10.3390/antiox12091717), 2023-09-04
Supplement: s1 [file s1]

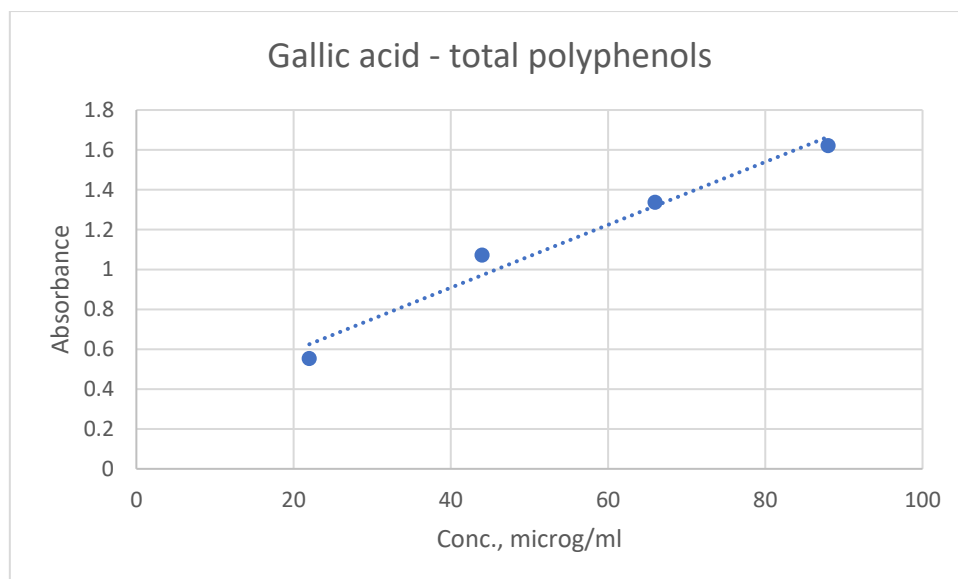

Figure S1. Calibration curve for the spectrophotometric determination of Total Polyphenol Content (TPC) of GTEs.

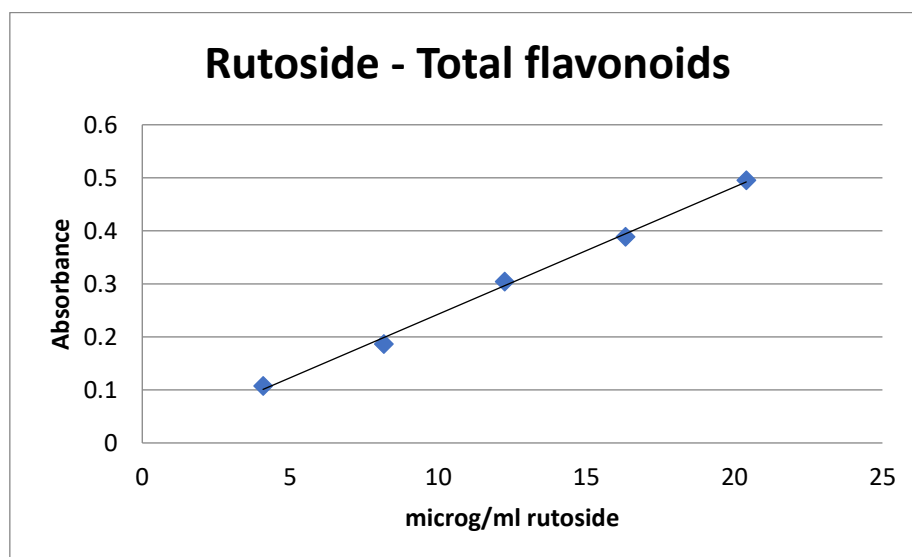

Figure S2. Calibration curve for the spectrophotometric determination of Total Flavonoid Content (TFC) of GTEs

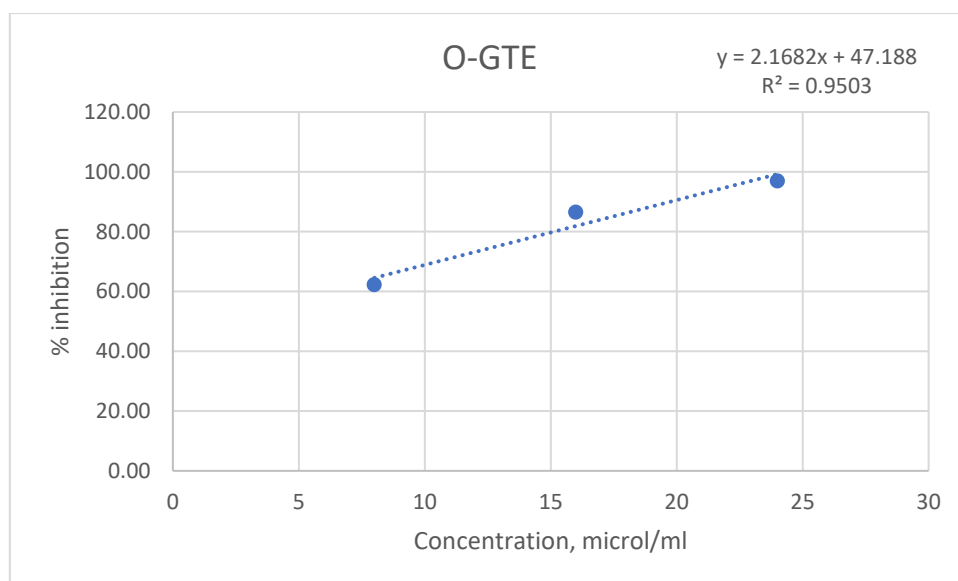

Figure S3. Calibration curve for the DPPH assay of the O-GTE (olive)

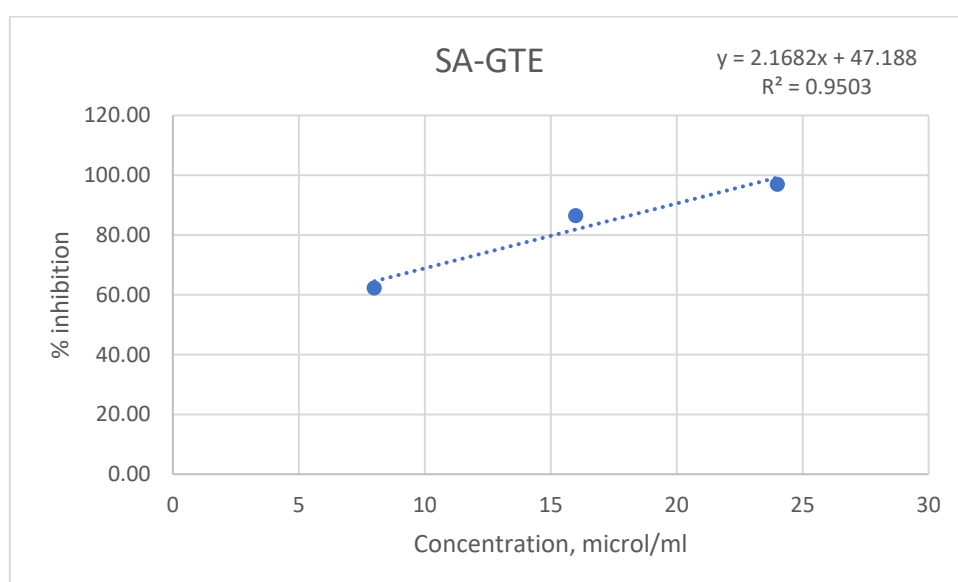

Figure S4. Calibration curve for the DPPH assay of the SA-GTE (sweet almond)

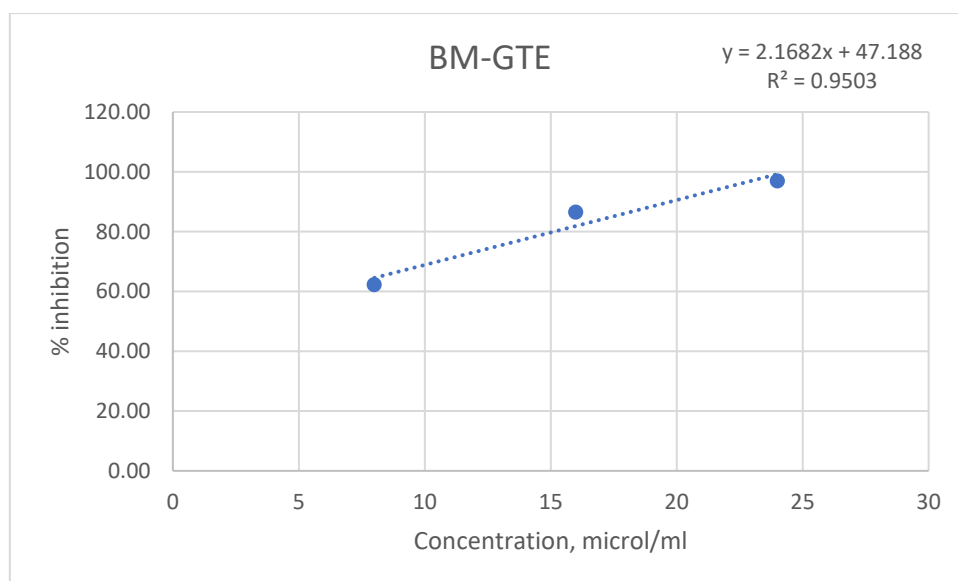

Figure S5. Calibration curve for the DPPH assay of the BM-GTE (black mulberry)

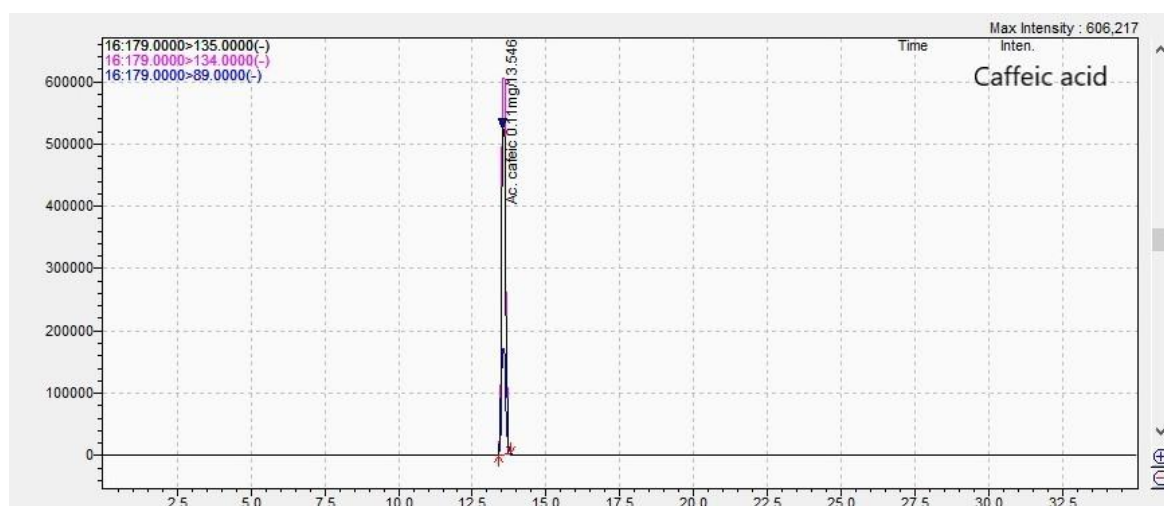

Figure S6. Chromatogram of caffeic acid obtained in the quantitative analysis of GTE specific selected polyphenols by UHPLC-ESI-MS.

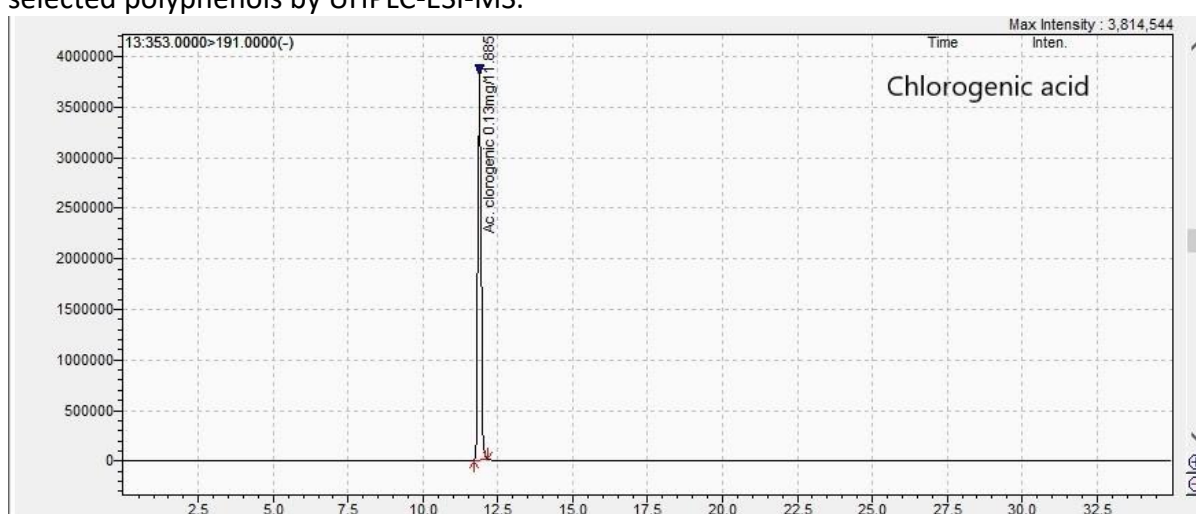

Figure S7. Chromatogram of chlorogenic acid obtained in the quantitative analysis of GTE specific selected polyphenols by UHPLC-ESI-MS.

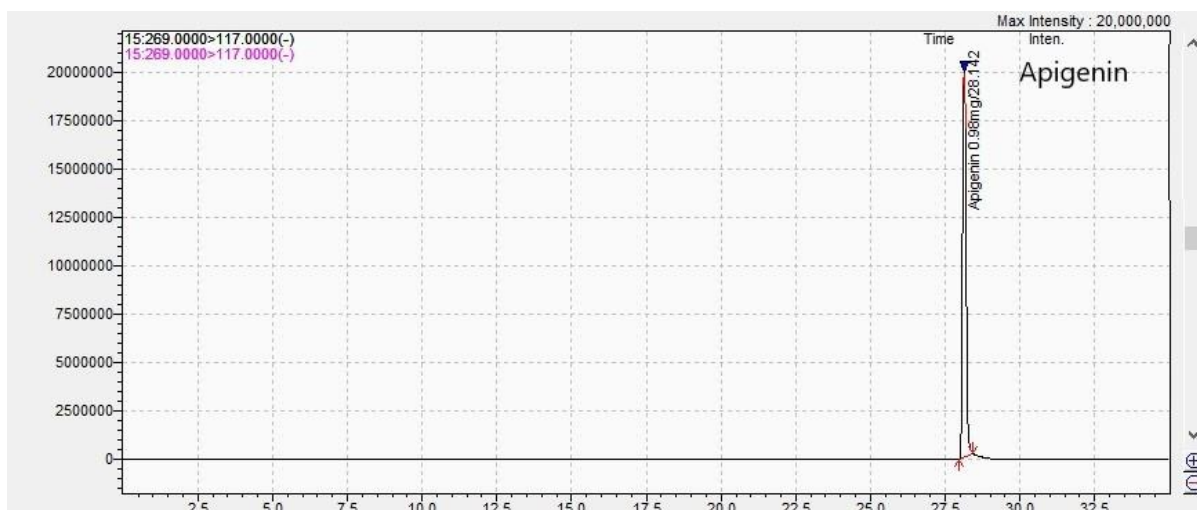

Figure S8. Chromatogram of apigenin obtained in the quantitative analysis of GTE specific selected polyphenols by UHPLC-ESI-MS.

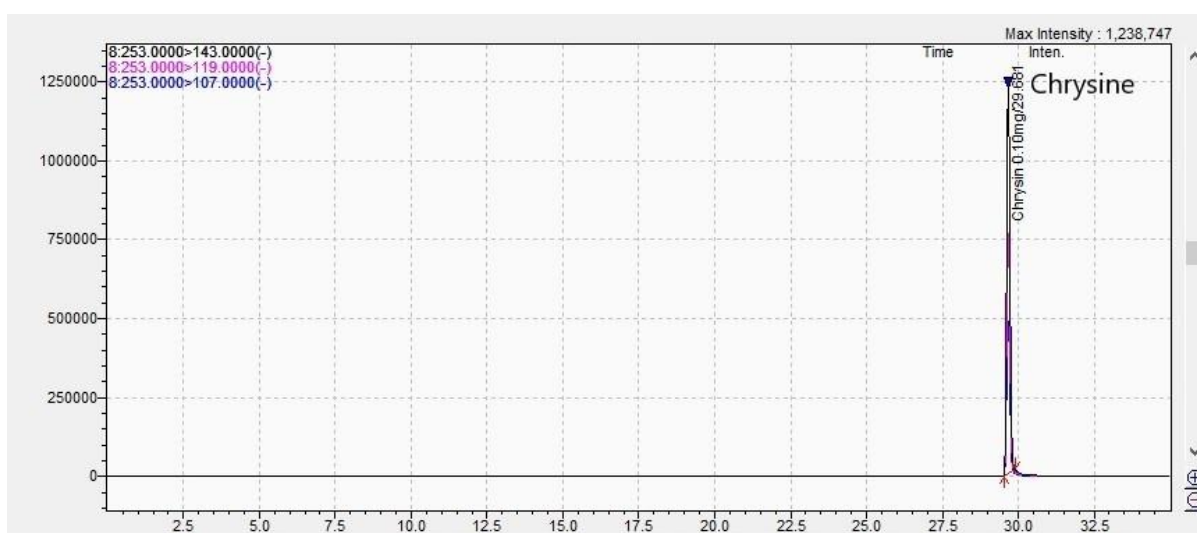

Figure S9. Chromatogram of chrysin obtained in the quantitative analysis of GTE specific selected polyphenols by UHPLC-ESI-MS.

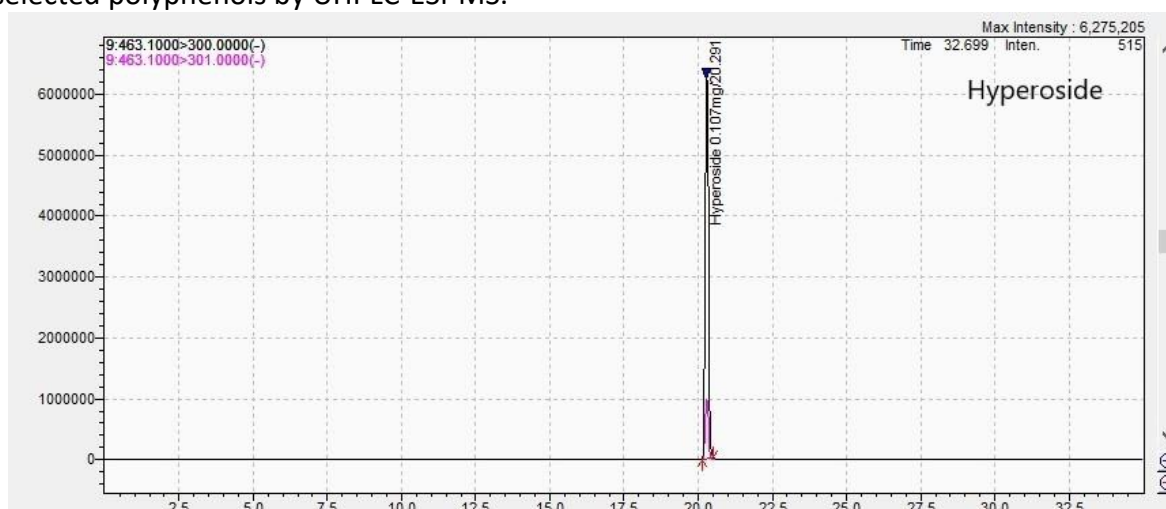

Figure S10. Chromatogram of hyperoside obtained in the quantitative analysis of GTE specific selected polyphenols by UHPLC-ESI-MS.

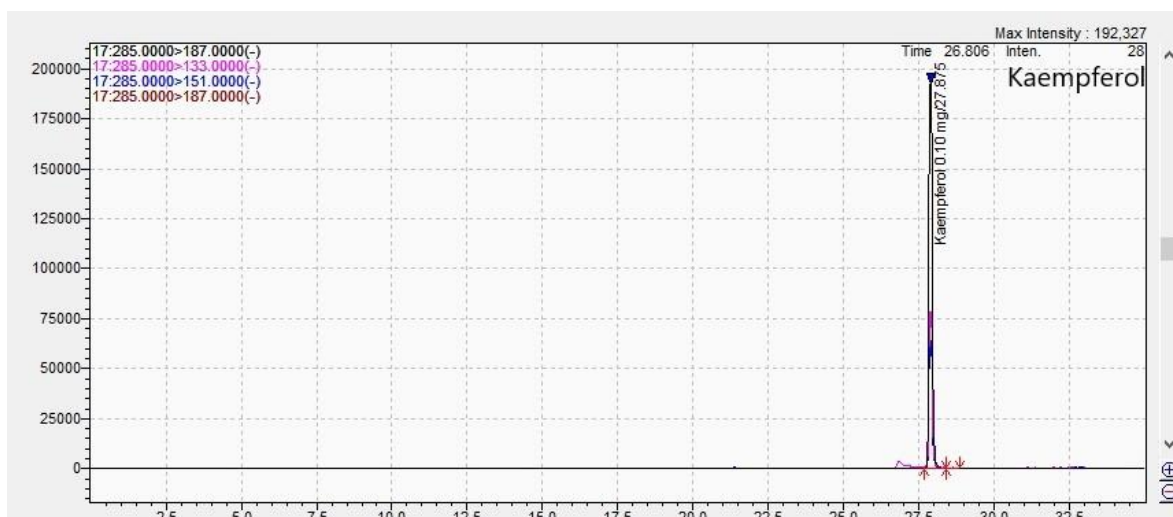

Figure S11. Chromatogram of kaempferol obtained in the quantitative analysis of GTE specific selected polyphenols by UHPLC-ESI-MS.

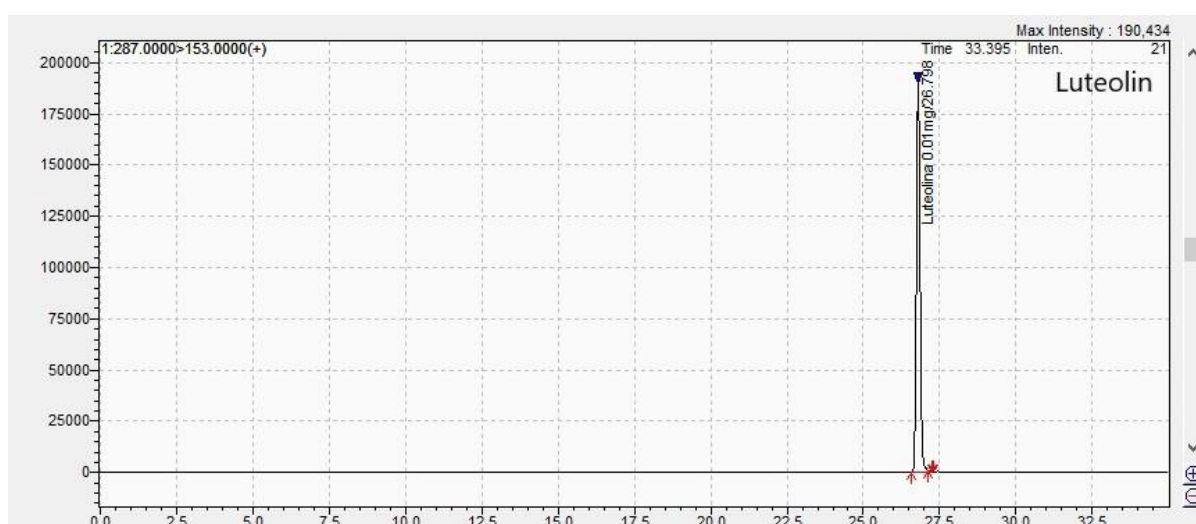

Figure S12. Chromatogram of luteolin obtained in the quantitative analysis of GTE specific selected polyphenols by UHPLC-ESI-MS.

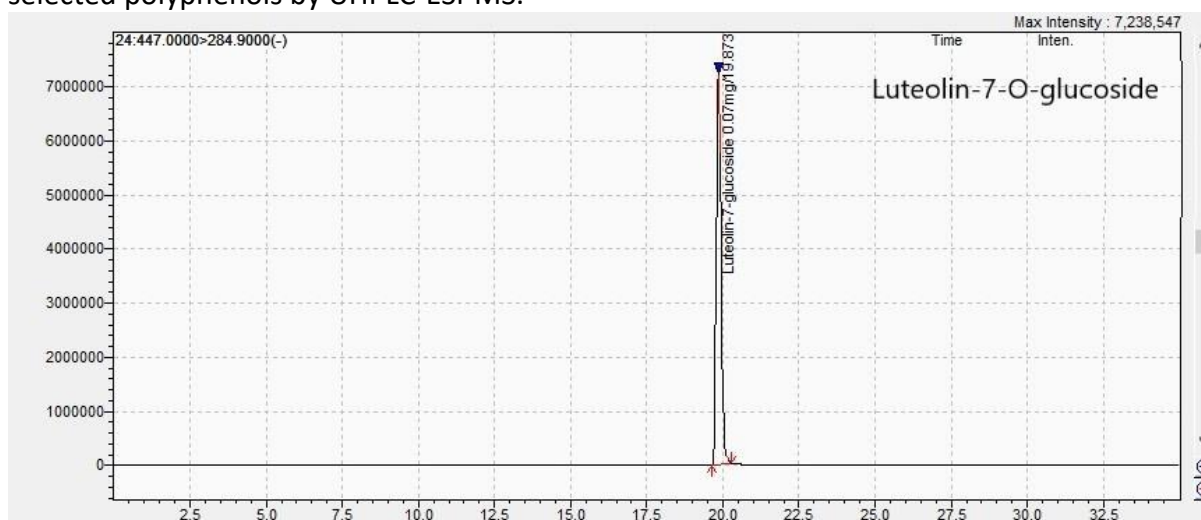

Figure S13. Chromatogram of luteolin-7-*o*-glucoside obtained in the quantitative analysis of GTE specific selected polyphenols by UHPLC-ESI-MS.

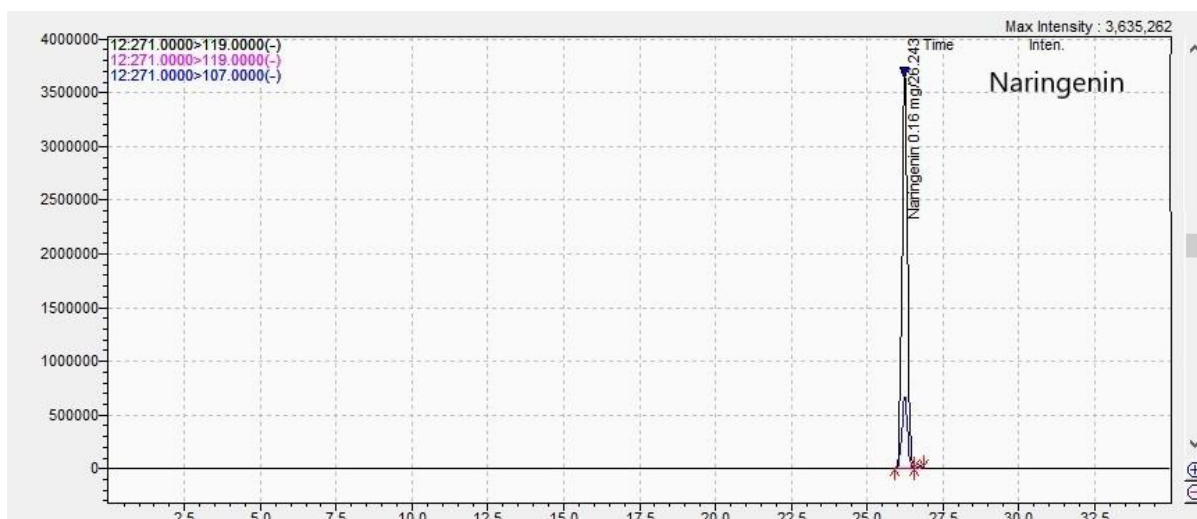

Figure S14. Chromatogram of naringenin obtained in the quantitative analysis of GTE specific selected polyphenols by UHPLC-ESI-MS.

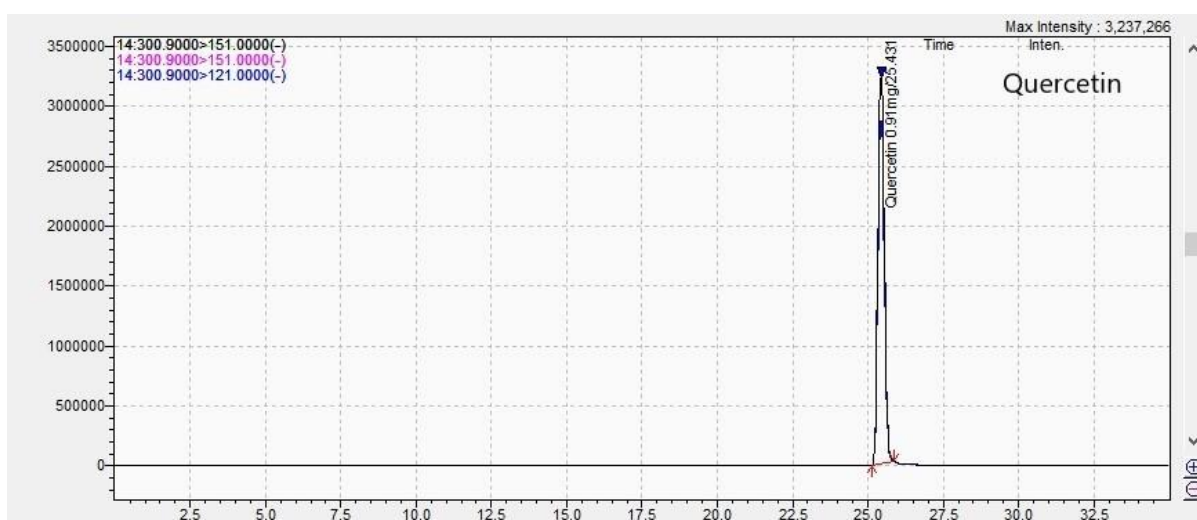

Figure S15. Chromatogram of quercetin obtained in the quantitative analysis of GTE specific selected polyphenols by UHPLC-ESI-MS.

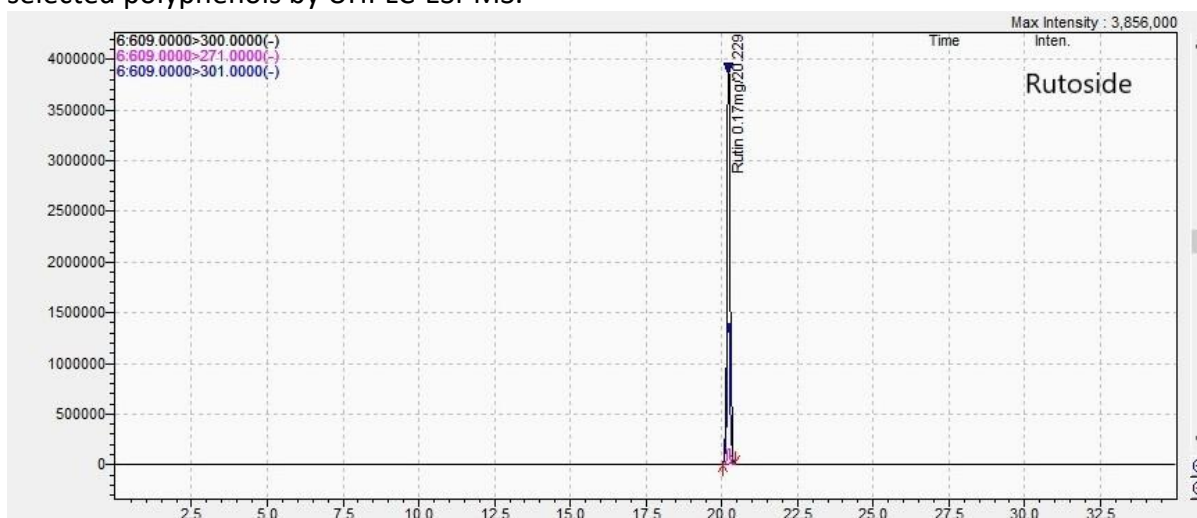

Figure S16. Chromatogram of rutoside obtained in the quantitative analysis of GTE specific selected polyphenols by UHPLC-ESI-MS.



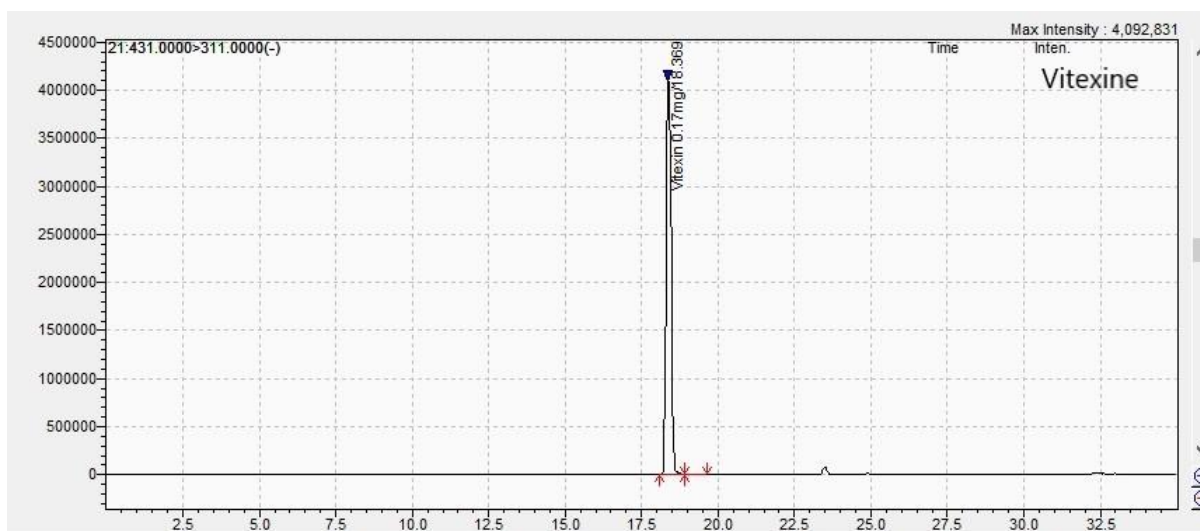

Figure S17. Chromatogram of vitexin obtained in the quantitative analysis of GTE specific selected polyphenols by UHPLC-ESI-MS.

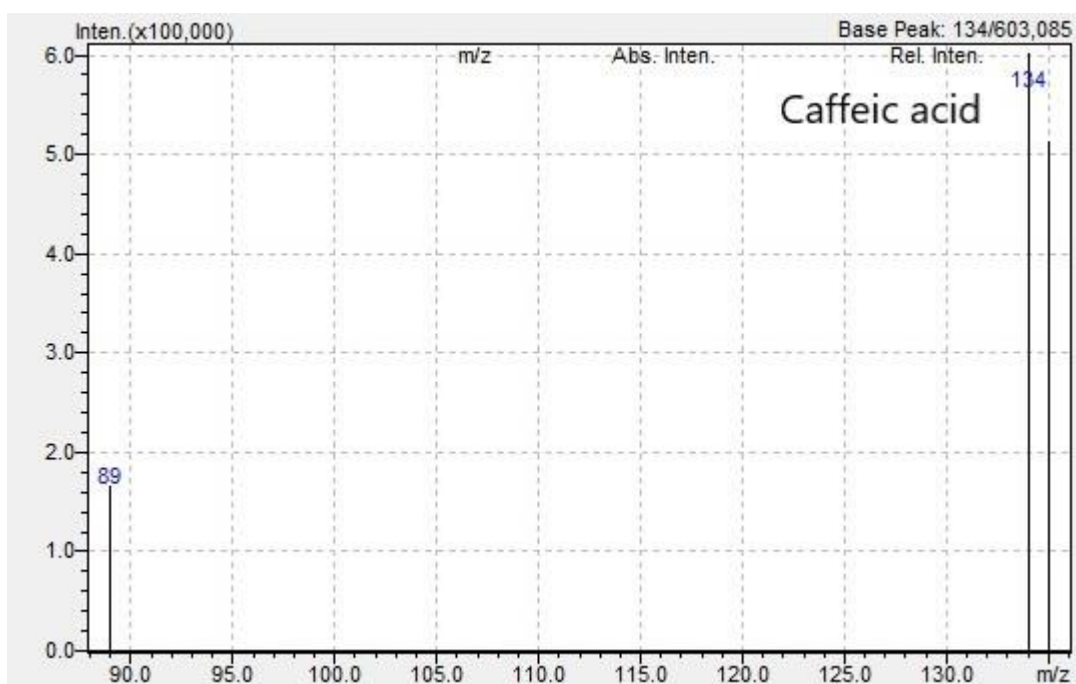

Figure S18. MS spectrum of caffeic acid obtained in the quantitative analysis of GTE specific selected polyphenols by UHPLC-ESI-MS

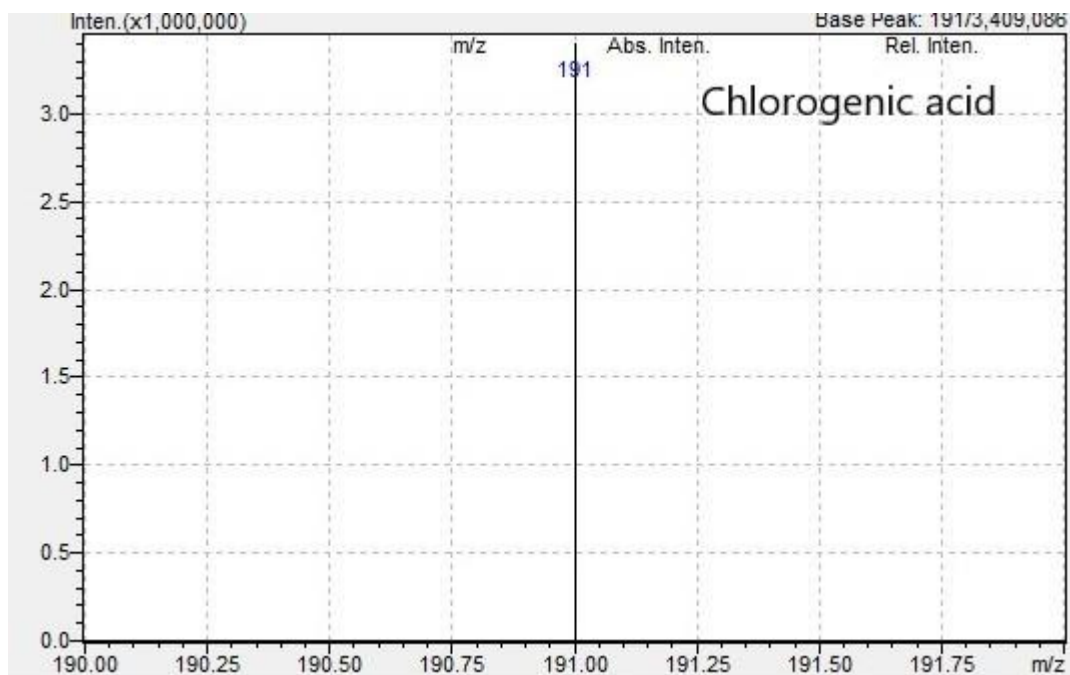

Figure S19. MS spectrum of chlorogenic acid obtained in the quantitative analysis of GTE specific selected polyphenols by UHPLC-ESI-MS

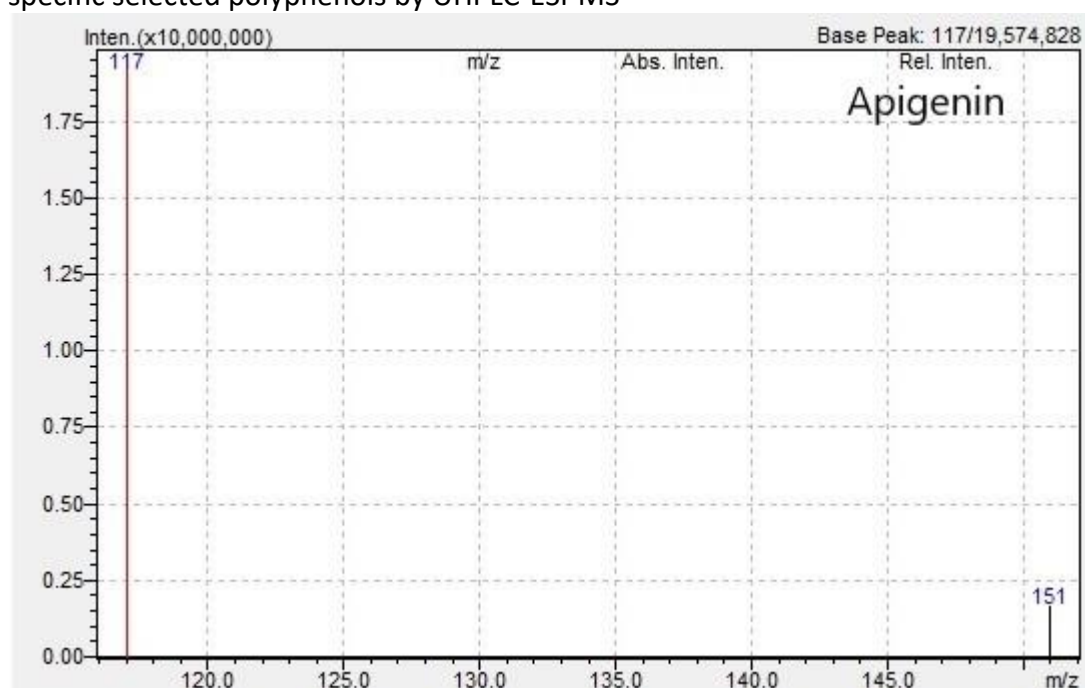

Figure S20. MS spectrum of apigenin obtained in the quantitative analysis of GTE specific selected polyphenols by UHPLC-ESI-MS



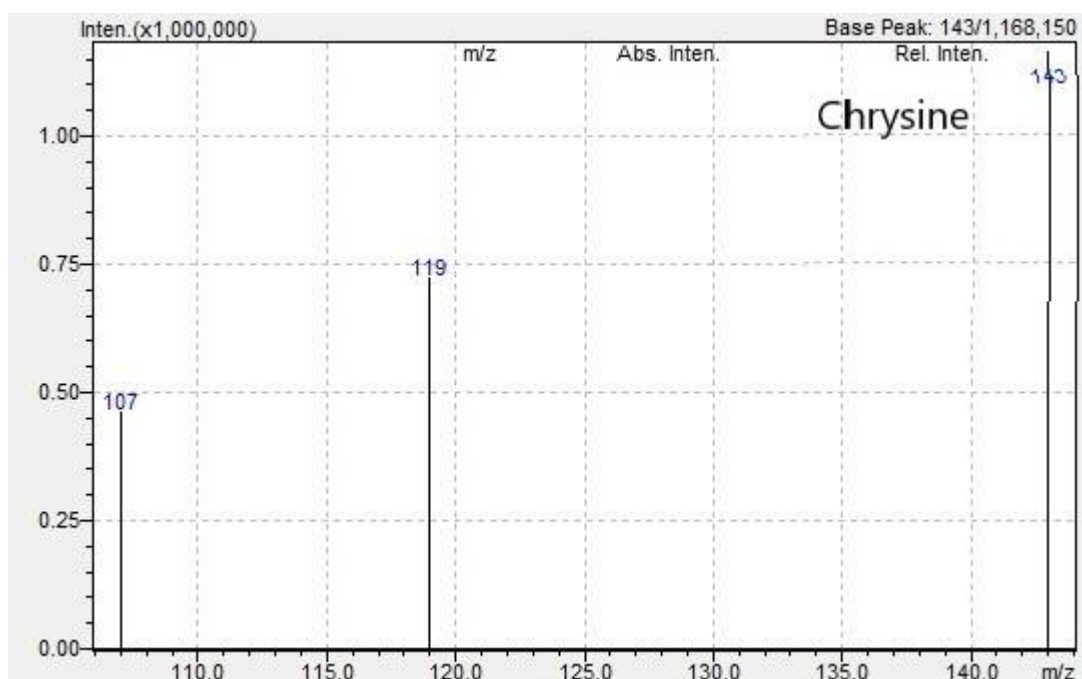

Figure S21. MS spectrum of chrysine obtained in the quantitative analysis of GTE specific selected polyphenols by UHPLC-ESI-MS

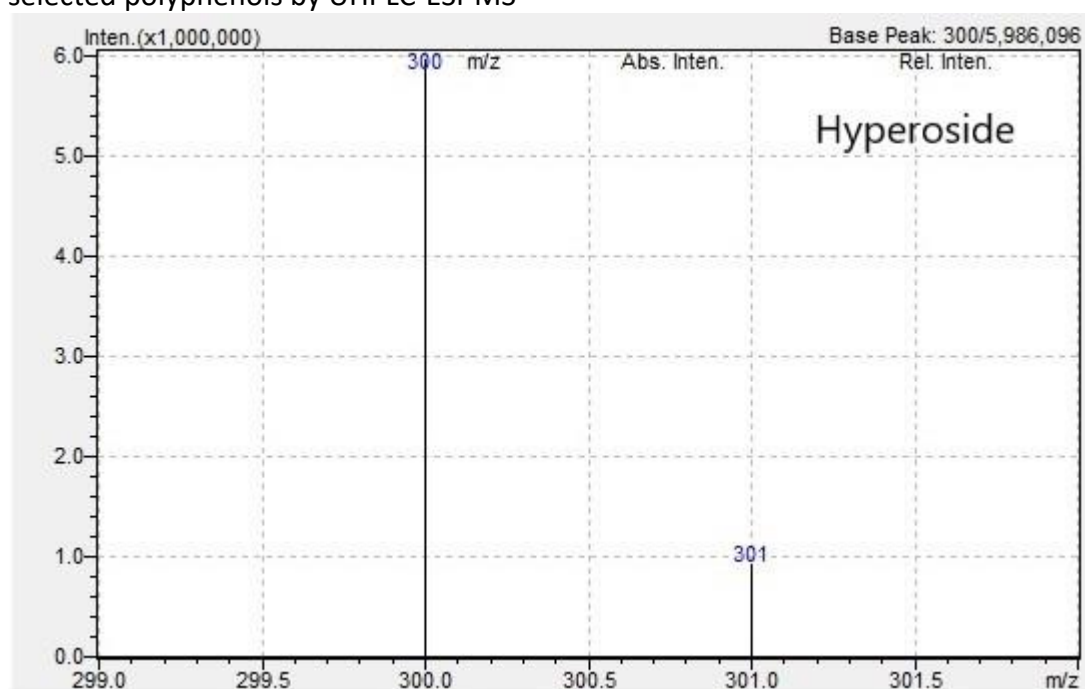

Figure S22. MS spectrum of hyperoside obtained in the quantitative analysis of GTE specific selected polyphenols by UHPLC-ESI-MS

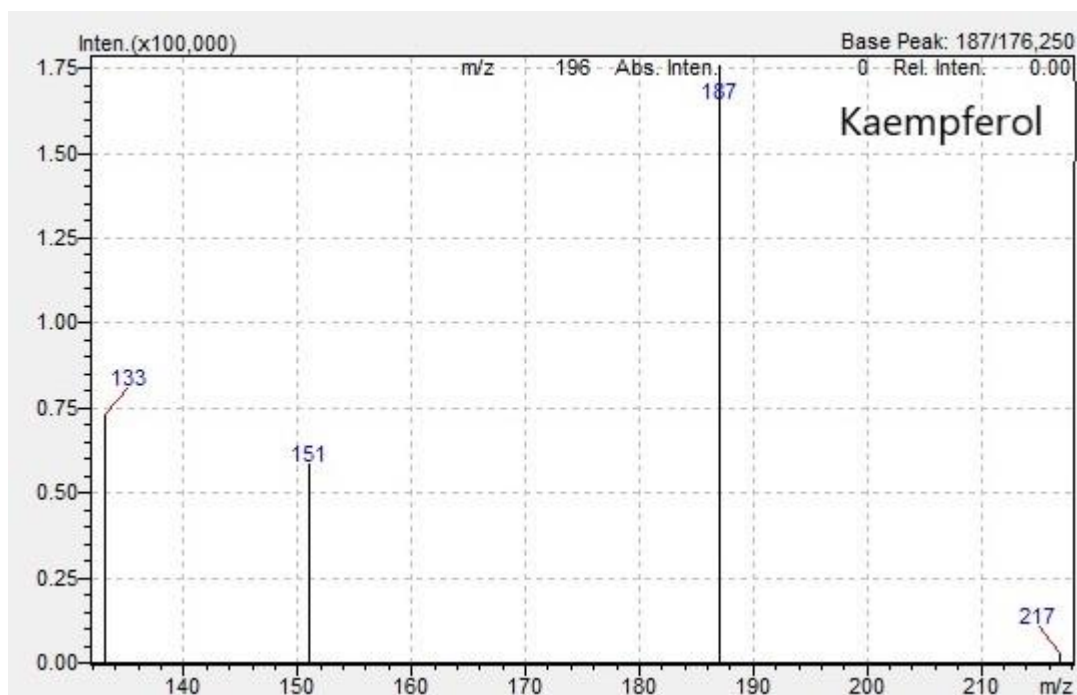

Figure S23. MS spectrum of kaempferol obtained in the quantitative analysis of GTE specific selected polyphenols by UHPLC-ESI-MS

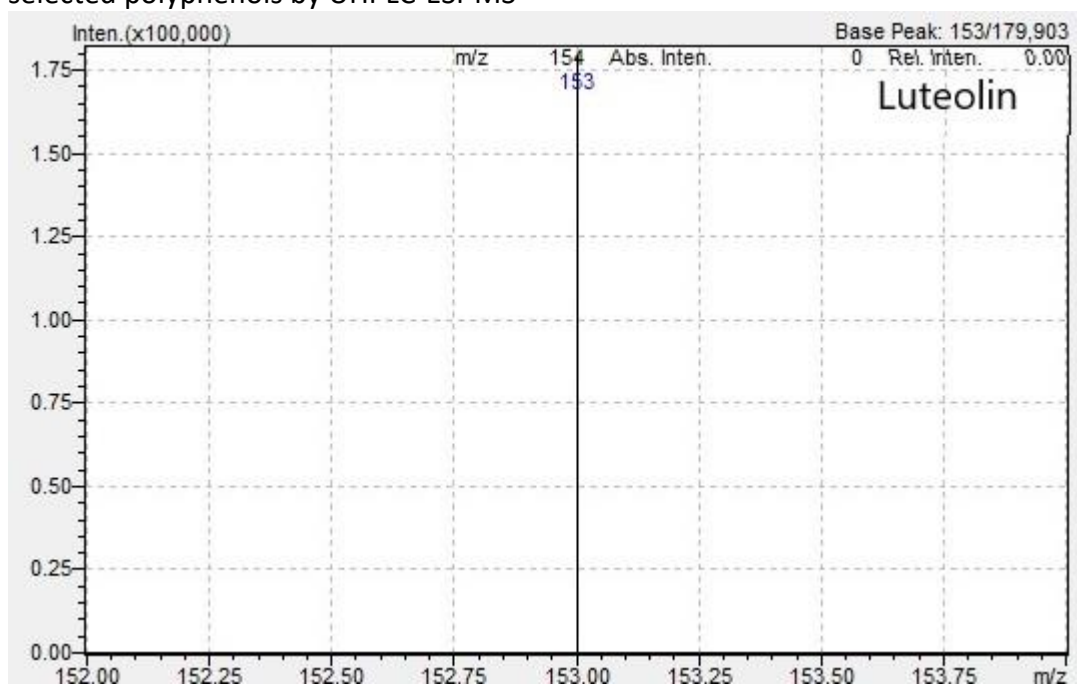

Figure S24. MS spectrum of luteolin obtained in the quantitative analysis of GTE specific selected polyphenols by UHPLC-ESI-MS

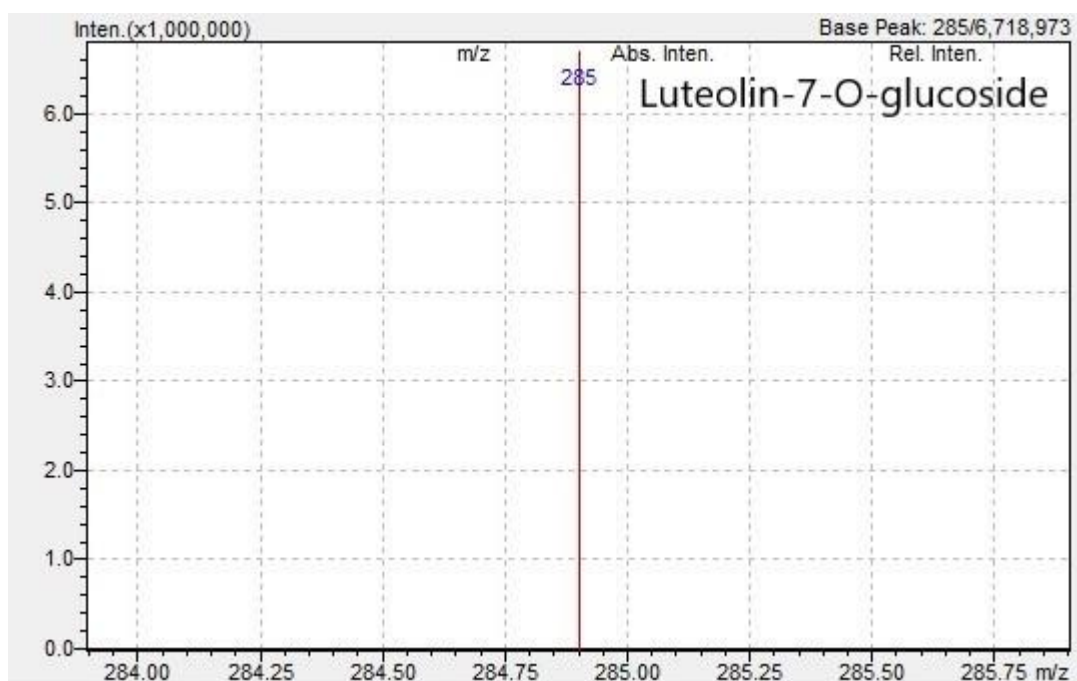

Figure S25. MS spectrum of luteolin-7-O-glucoside obtained in the quantitative analysis of GTE specific selected polyphenols by UHPLC-ESI-MS

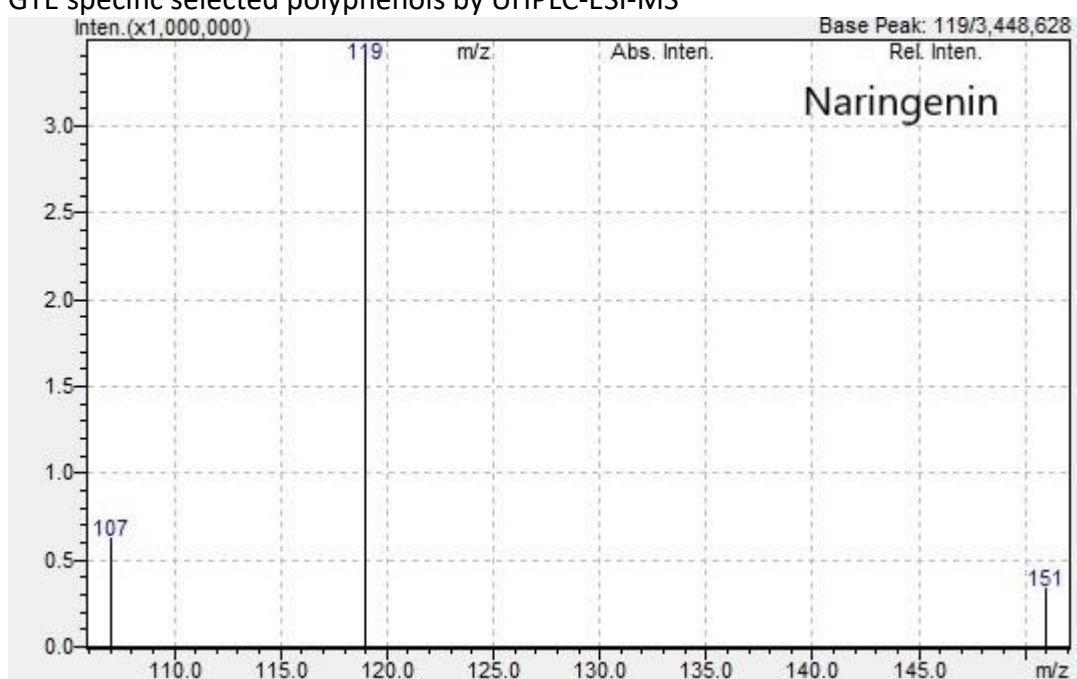

Figure S26. MS spectrum of naringenin obtained in the quantitative analysis of GTE specific selected polyphenols by UHPLC-ESI-MS

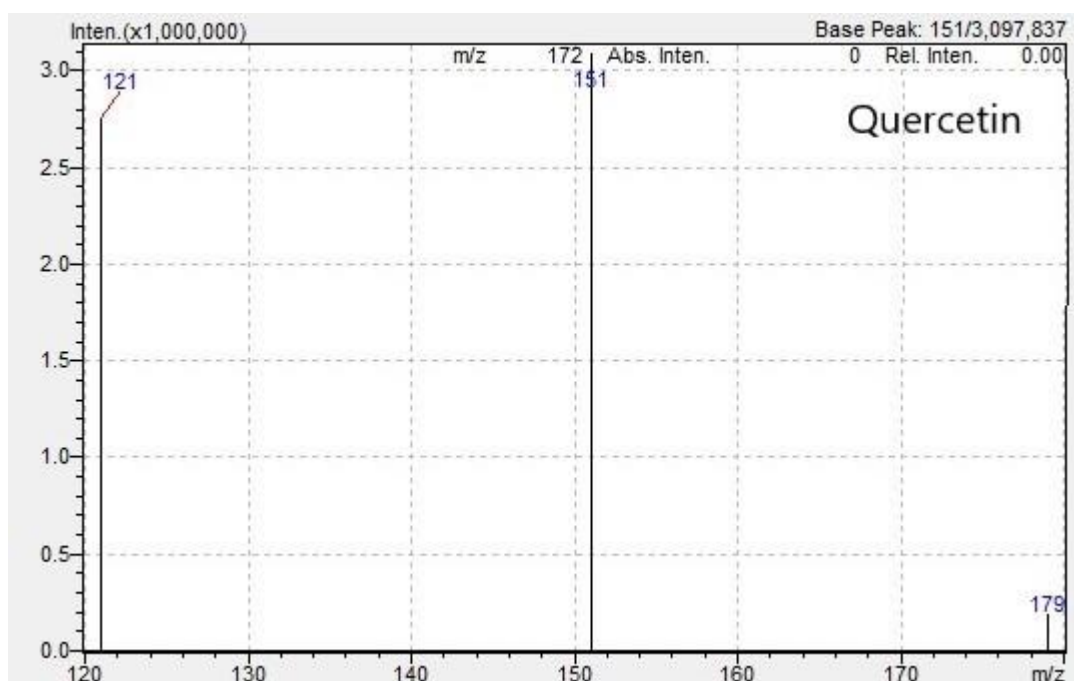

Figure S27. MS spectrum of quercetin obtained in the quantitative analysis of GTE specific selected polyphenols by UHPLC-ESI-MS

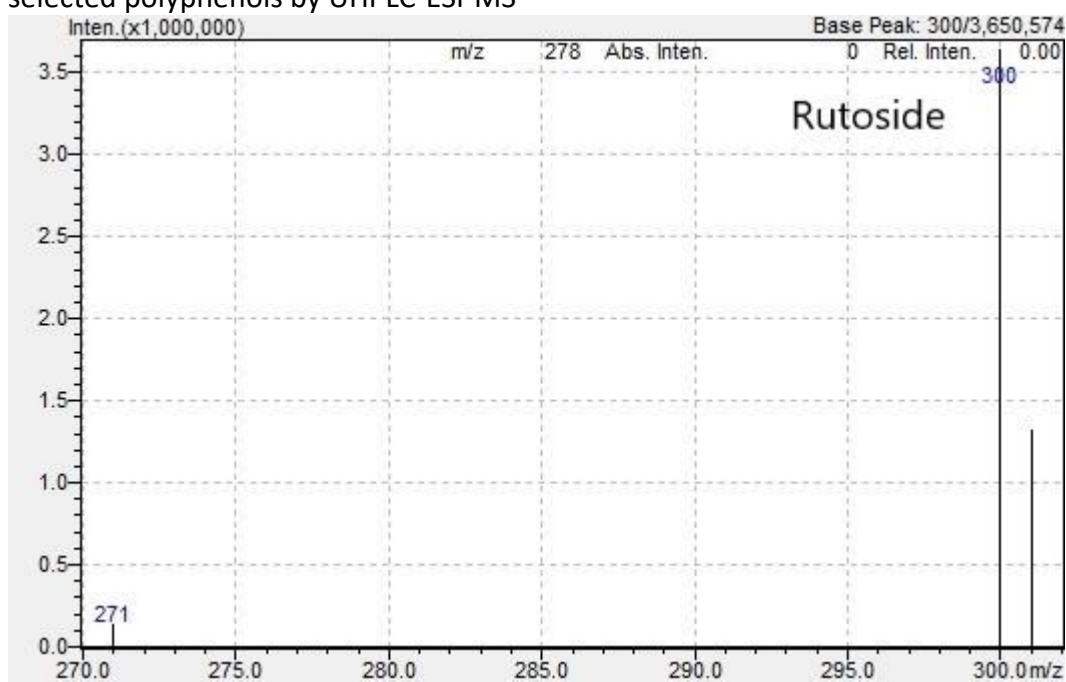

Figure S28. MS spectrum of rutoside obtained in the quantitative analysis of GTE specific selected polyphenols by UHPLC-ESI-MS

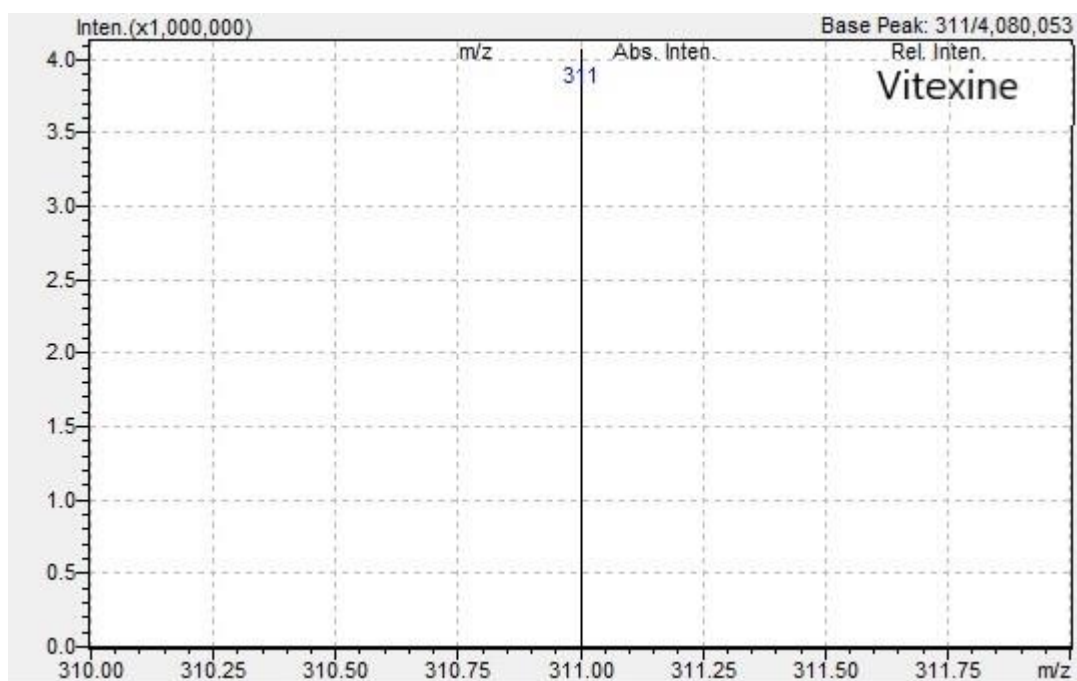

Figure S29. MS spectrum of vitexin obtained in the quantitative analysis of GTE specific selected polyphenols by UHPLC-ESI-MS

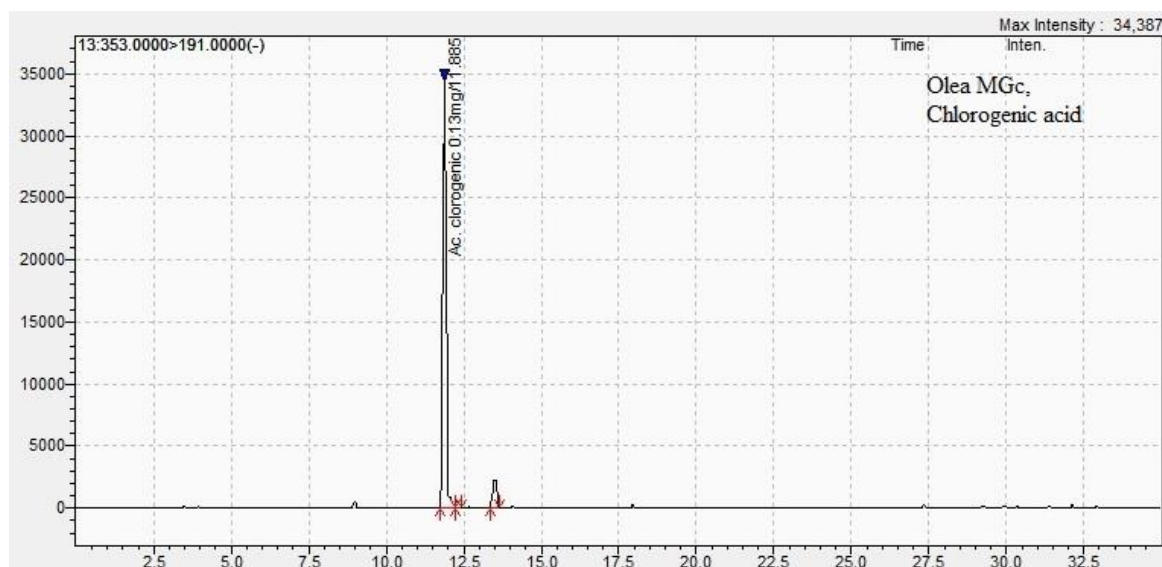

Figure S30. Chromatogram of chlorogenic acid obtained in the quantitative analysis of selected polyphenols of the O-GTE (olive)

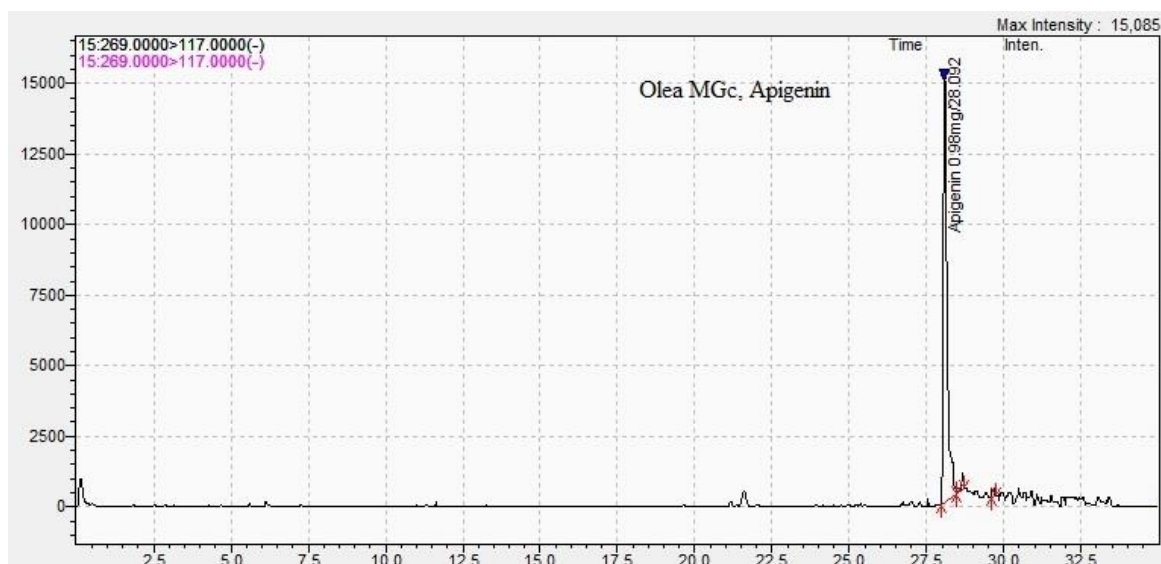

Figure S31. Chromatogram of apigenin obtained in the quantitative analysis of selected polyphenols of the O-GTE (olive)

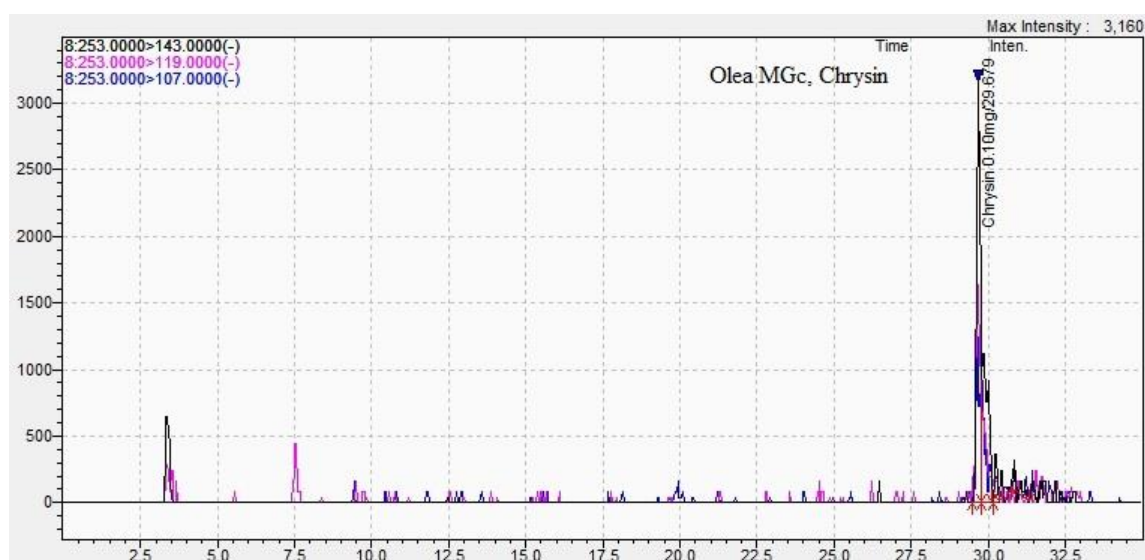

Figure S32. Chromatogram of chrysin obtained in the quantitative analysis of selected polyphenols of the O-GTE (olive)



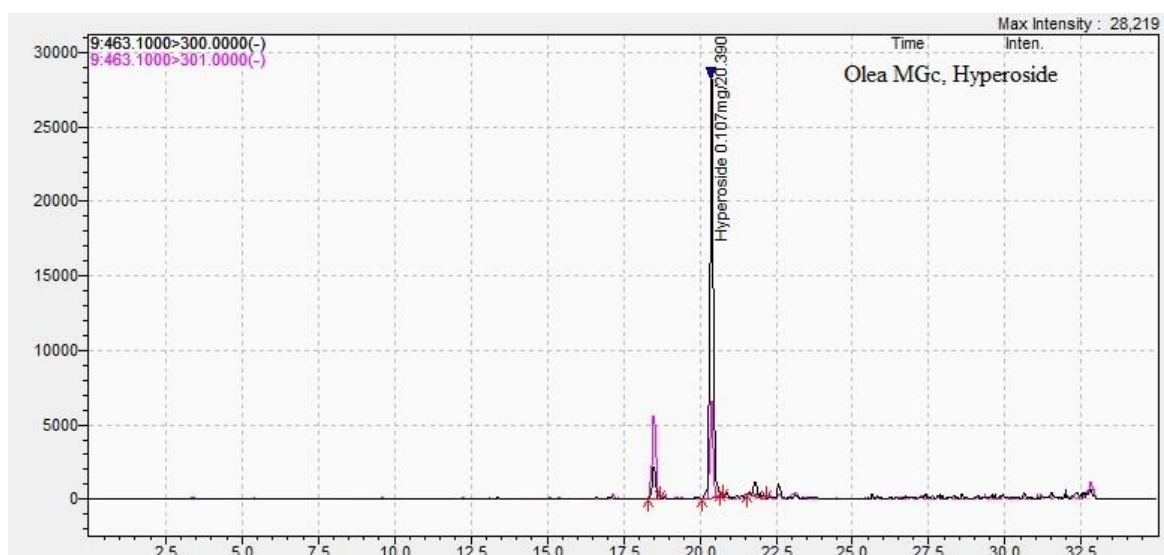

Figure S33. Chromatogram of hyperoside obtained in the quantitative analysis of selected polyphenols of the O-GTE (olive)

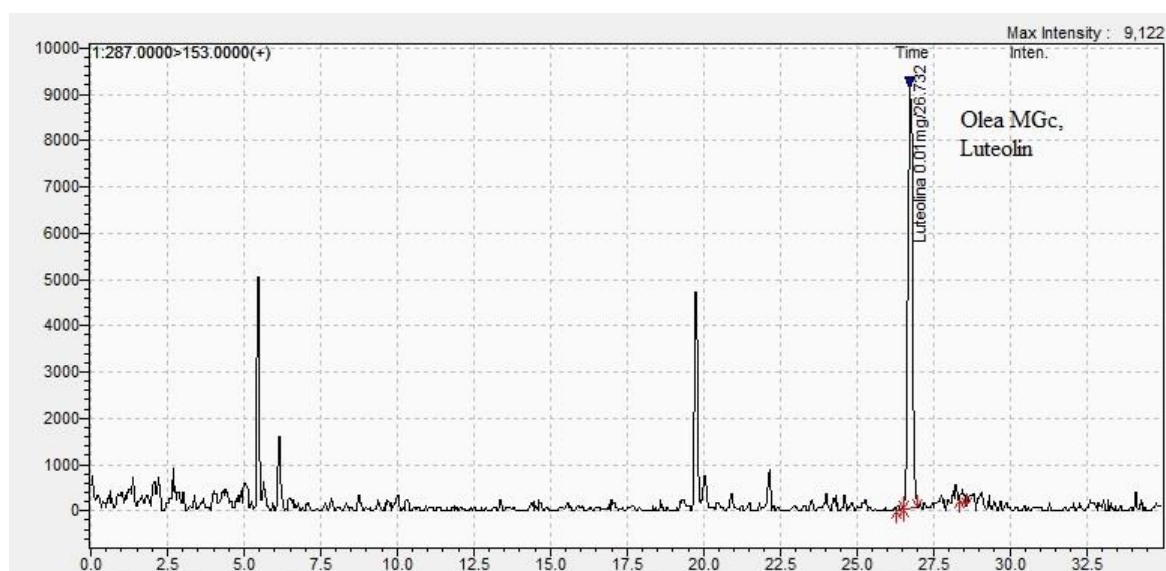

Figure S34. Chromatogram of luteolin obtained in the quantitative analysis of selected polyphenols of the O-GTE (olive)

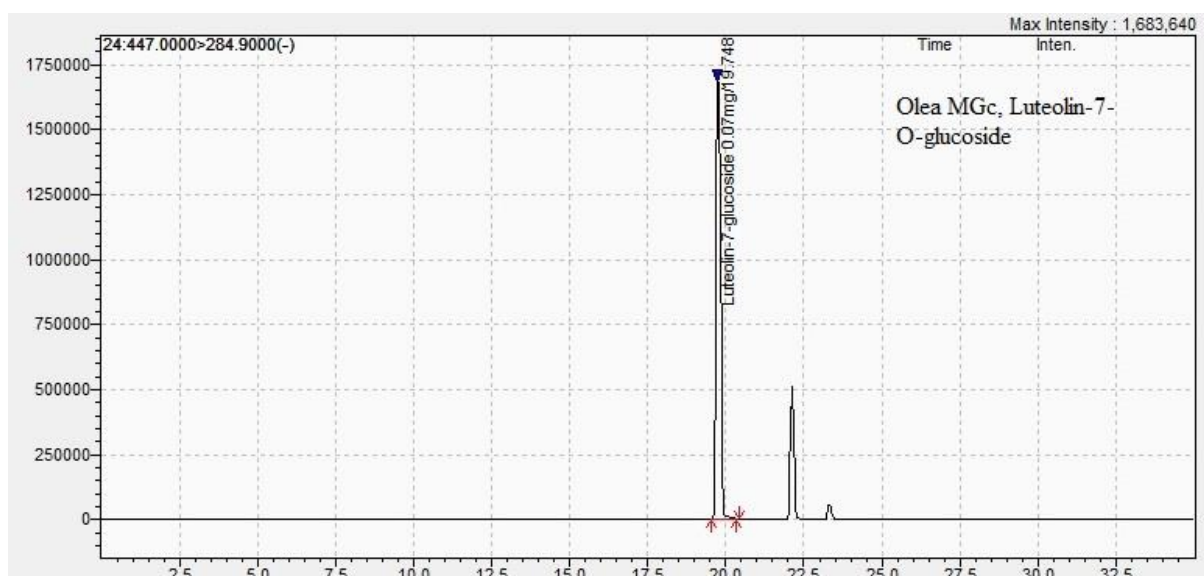

Figure S35. Chromatogram of luteolin-7-*O*-glucoside obtained in the quantitative analysis of selected polyphenols of the O-GTE (olive)

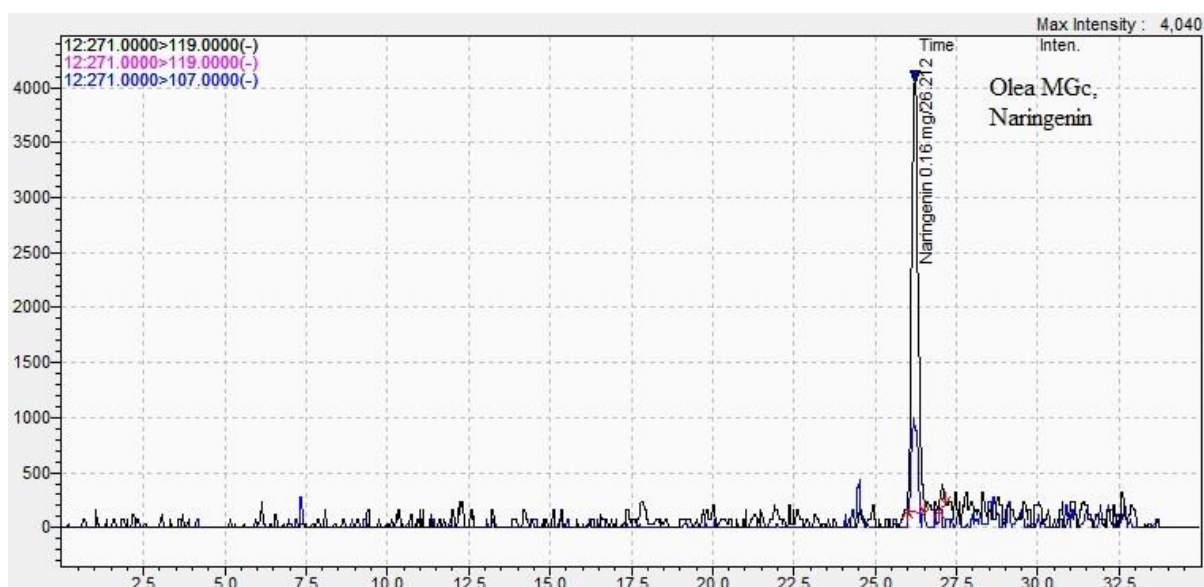

Figure S36. Chromatogram of naringenin obtained in the quantitative analysis of selected polyphenols of the O-GTE (olive)

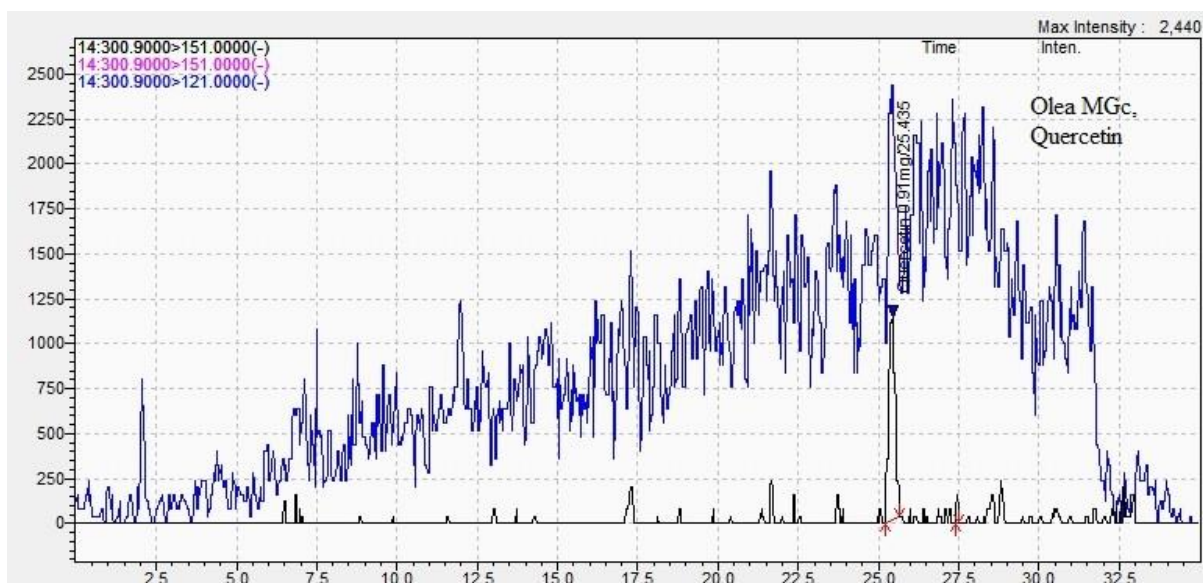

Figure S37. Chromatogram of quercetin obtained in the quantitative analysis of selected polyphenols of the O-GTE (olive)

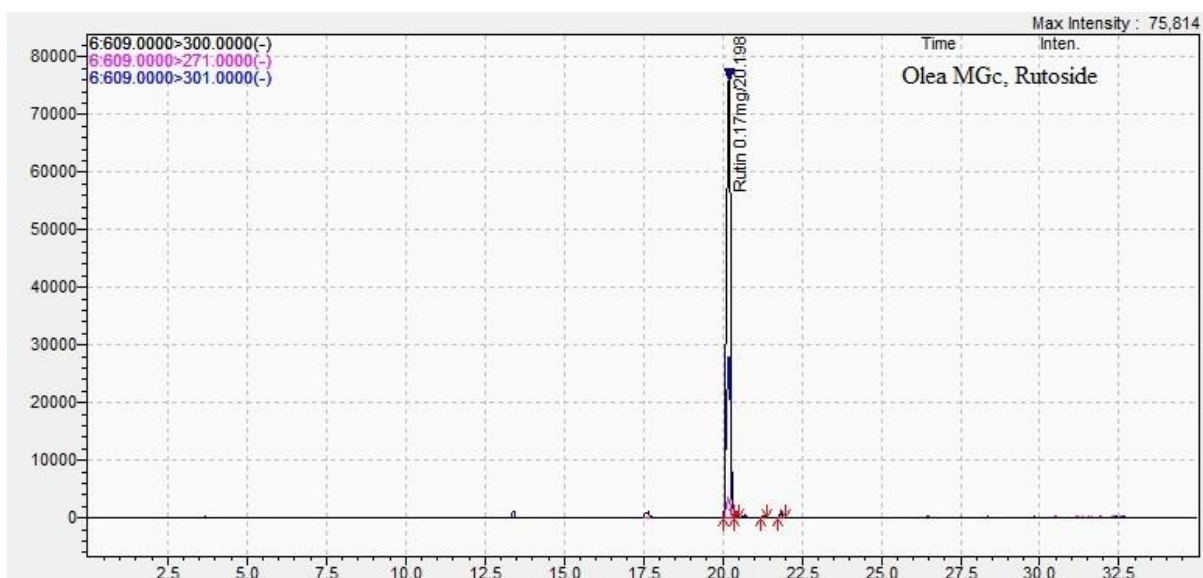

Figure S38. Chromatogram of rutinoside obtained in the quantitative analysis of selected polyphenols of the O-GTE (olive)

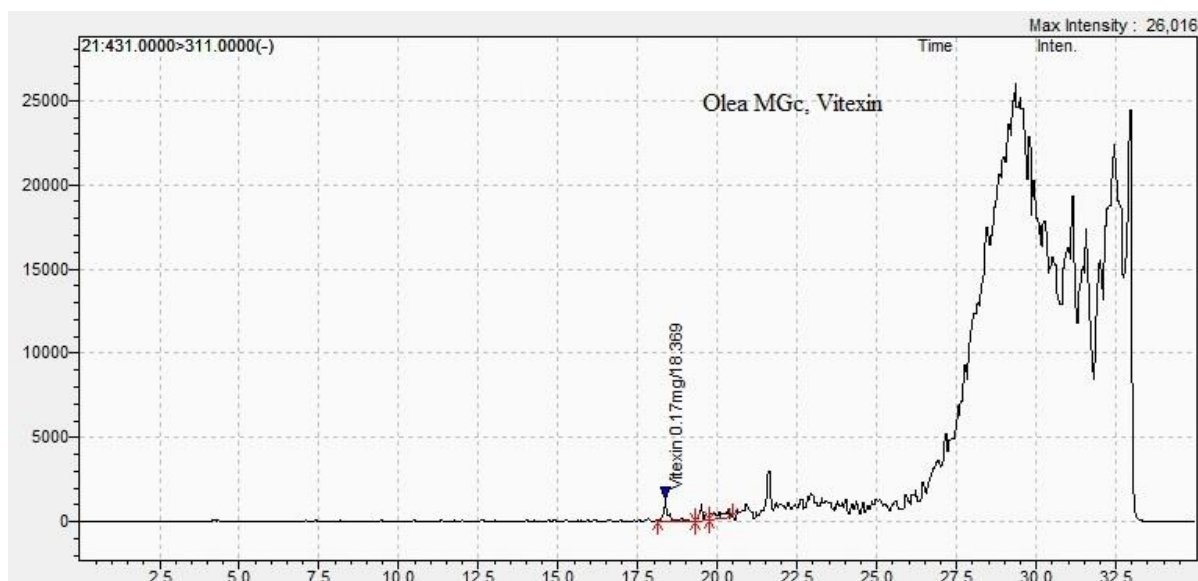

Figure S39. Chromatogram of vitexin obtained in the quantitative analysis of selected polyphenols of the O-GTE (olive)

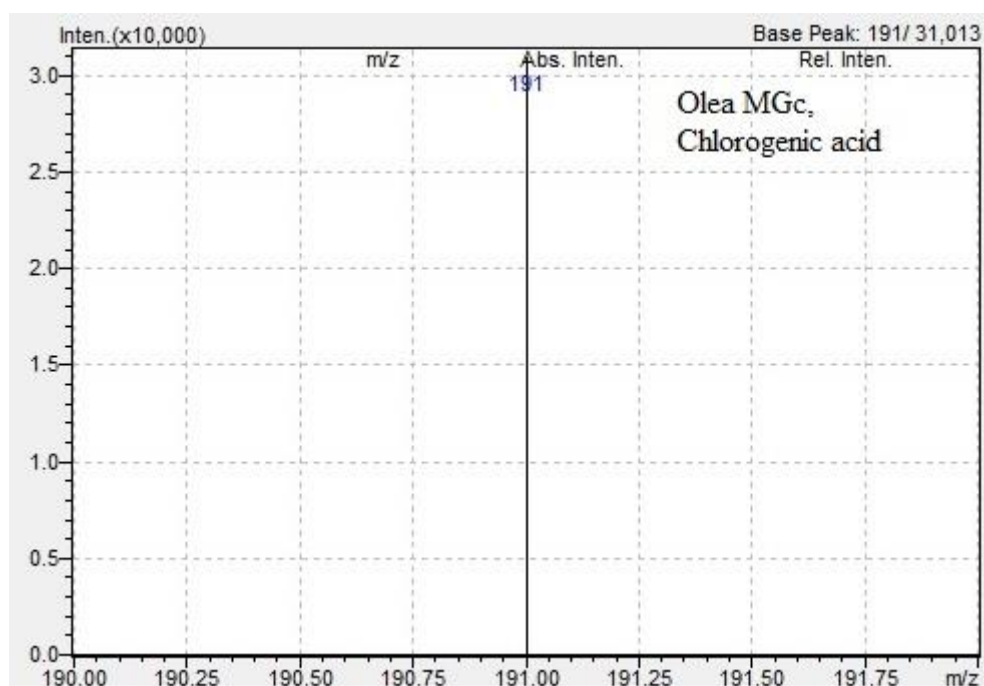

Figure S40. MS spectrum of chlorogenic acid obtained in the quantitative analysis of selected polyphenols of the O-GTE (olive)

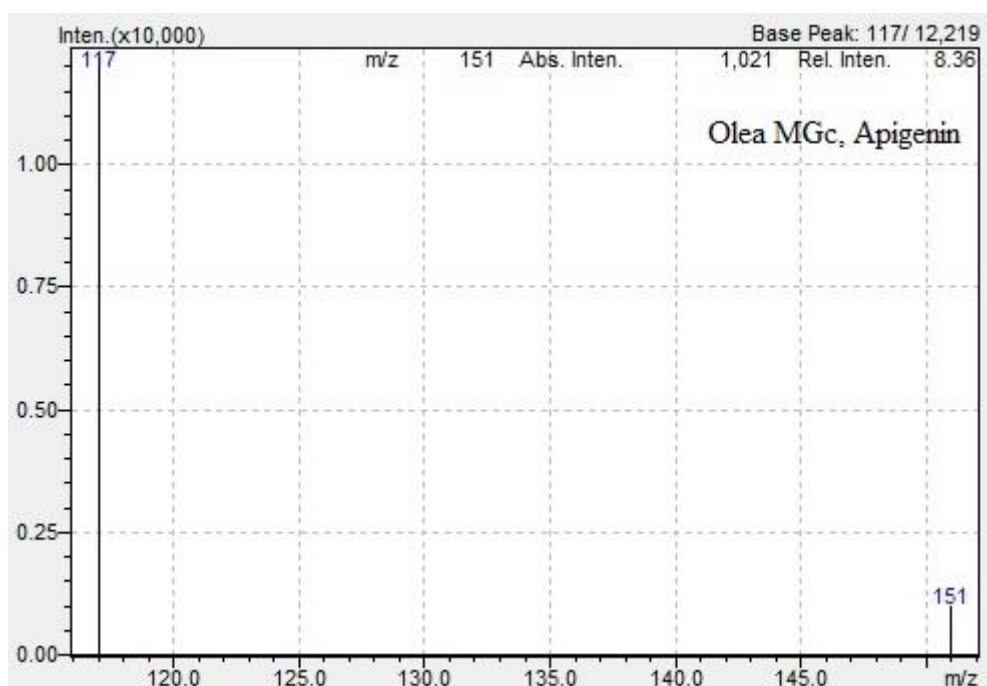

Figure S41. MS spectrum of apigenin obtained in the quantitative analysis of selected polyphenols of the O-GTE (olive)

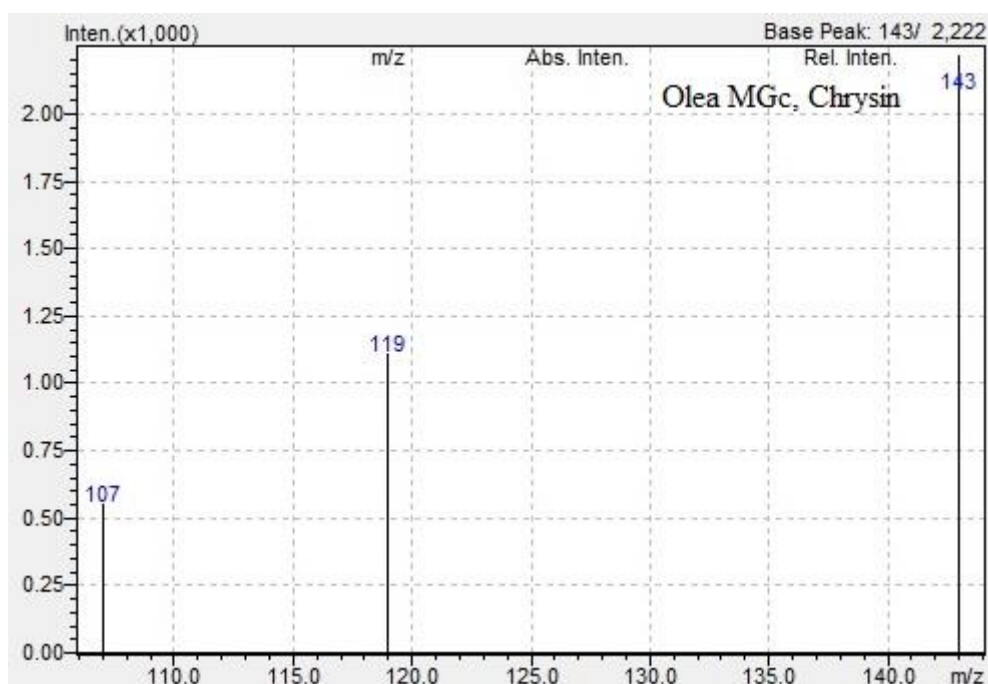

Figure S42. MS spectrum of chrysin obtained in the quantitative analysis of selected polyphenols of the O-GTE (olive)



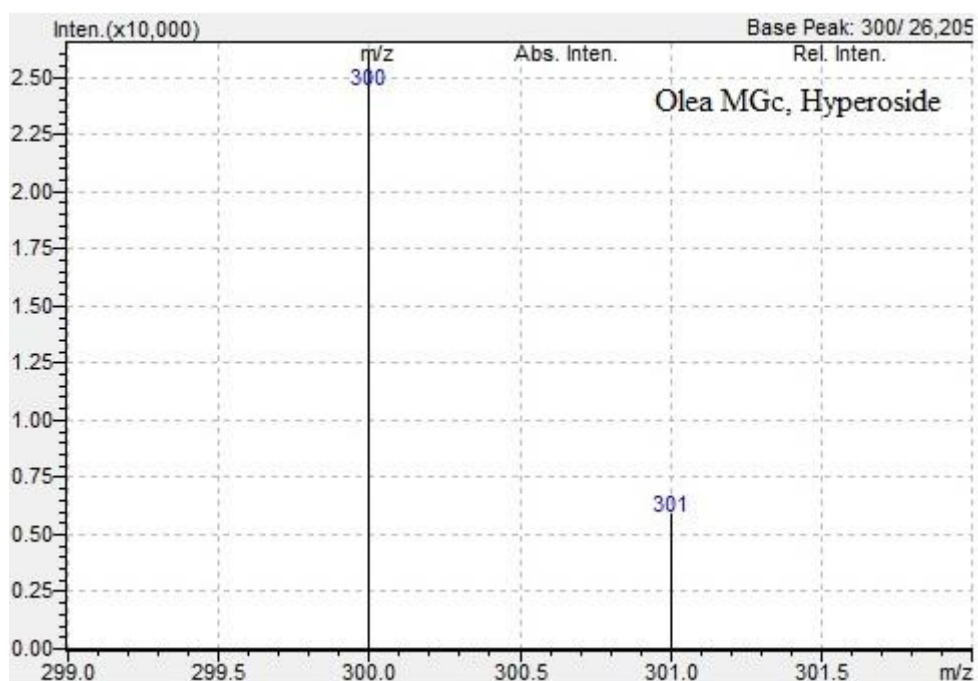

Figure S43. MS spectrum of hyperoside obtained in the quantitative analysis of selected polyphenols of the O-GTE (olive)

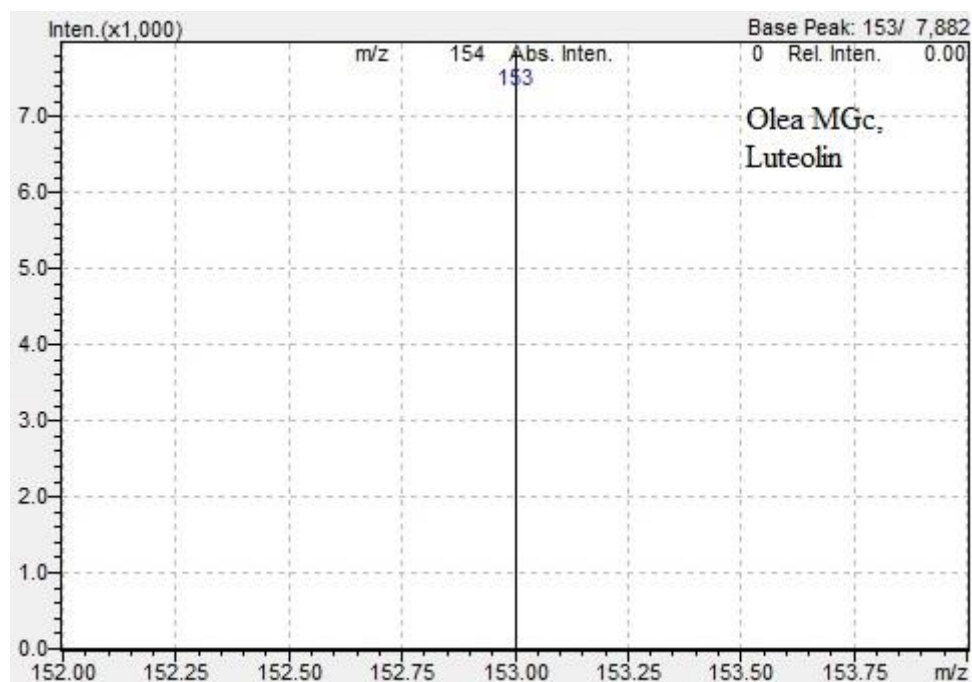

Figure S44. MS spectrum of luteolin obtained in the quantitative analysis of selected polyphenols of the O-GTE (olive)



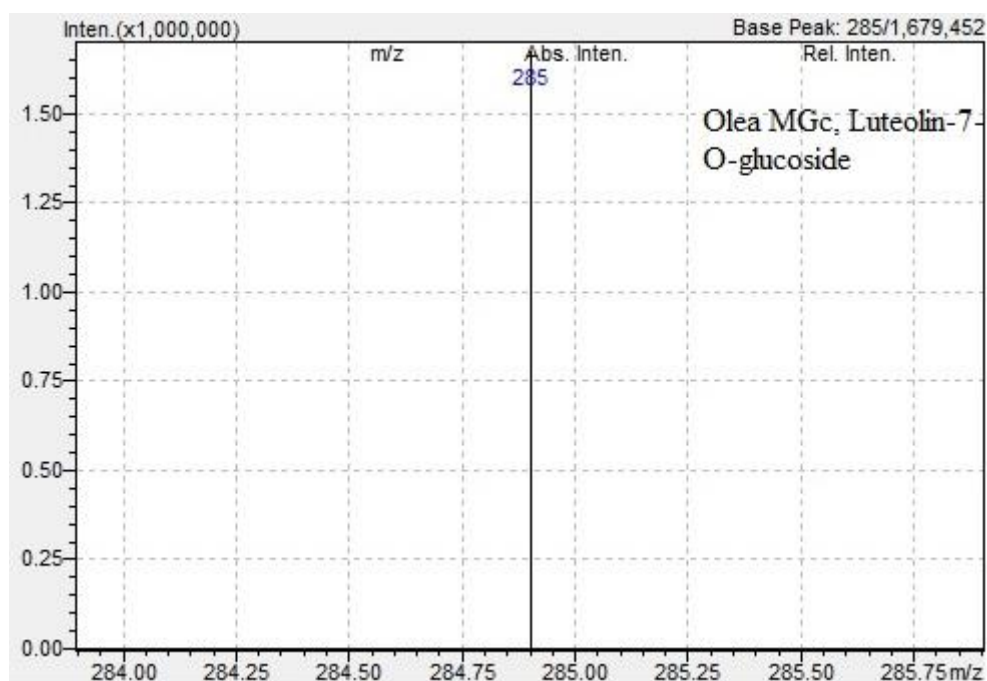

Figure S45. MS spectrum of luteolin-7-*O*-glucoside obtained in the quantitative analysis of selected polyphenols of the O-GTE (olive)

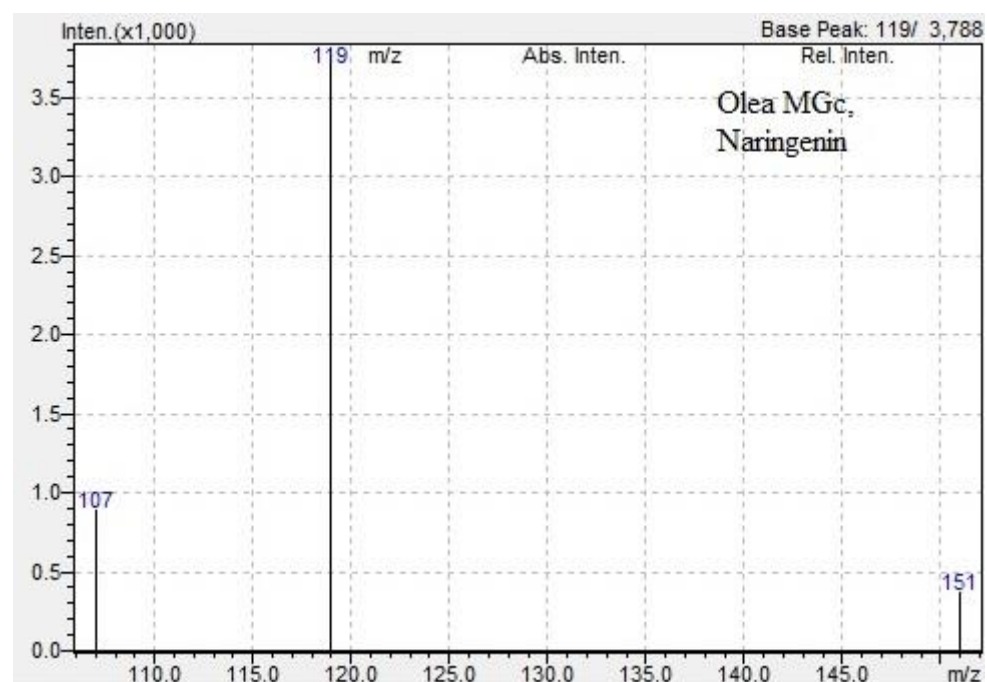

Figure S46. MS spectrum of naringenin obtained in the quantitative analysis of selected polyphenols of the O-GTE (olive)

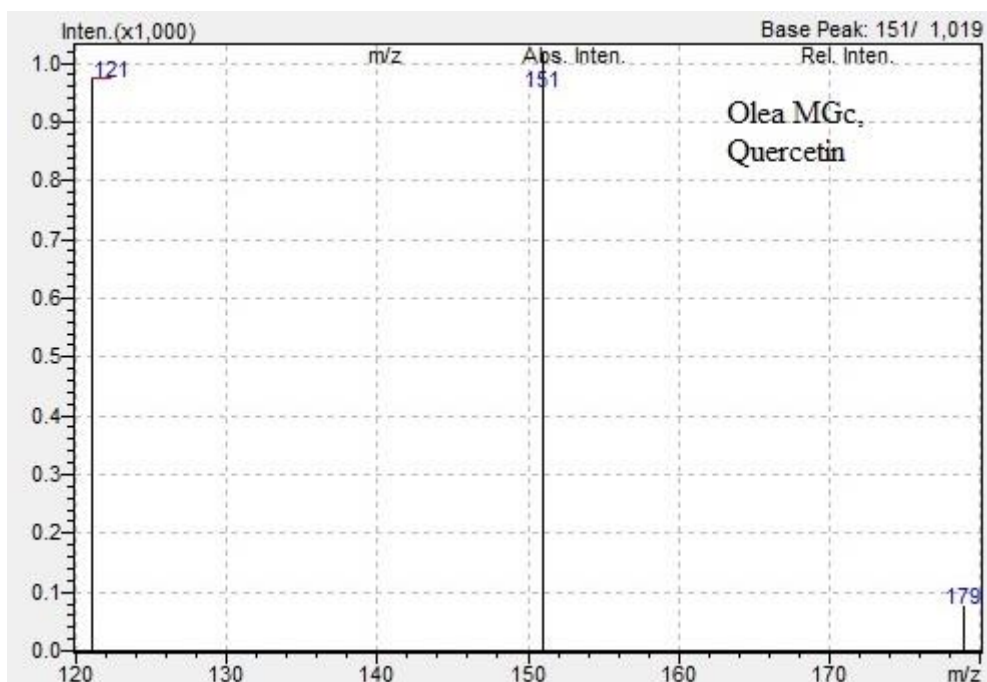

Figure S47. MS spectrum of quercetin obtained in the quantitative analysis of selected polyphenols of the O-GTE (olive)

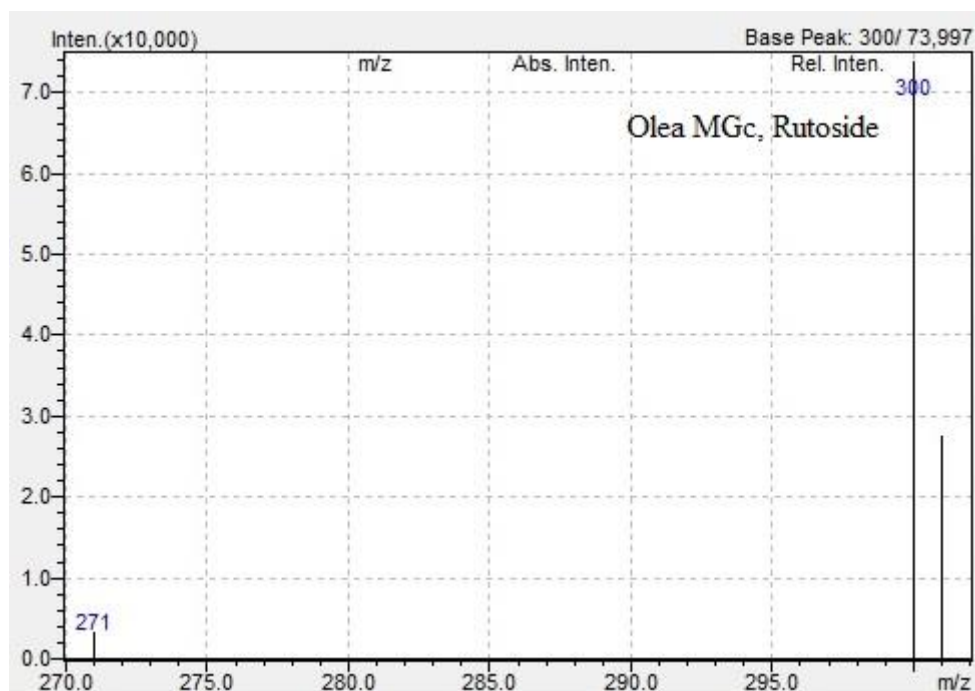

Figure S48. MS spectrum of rutoside obtained in the quantitative analysis of selected polyphenols of the O-GTE (olive)

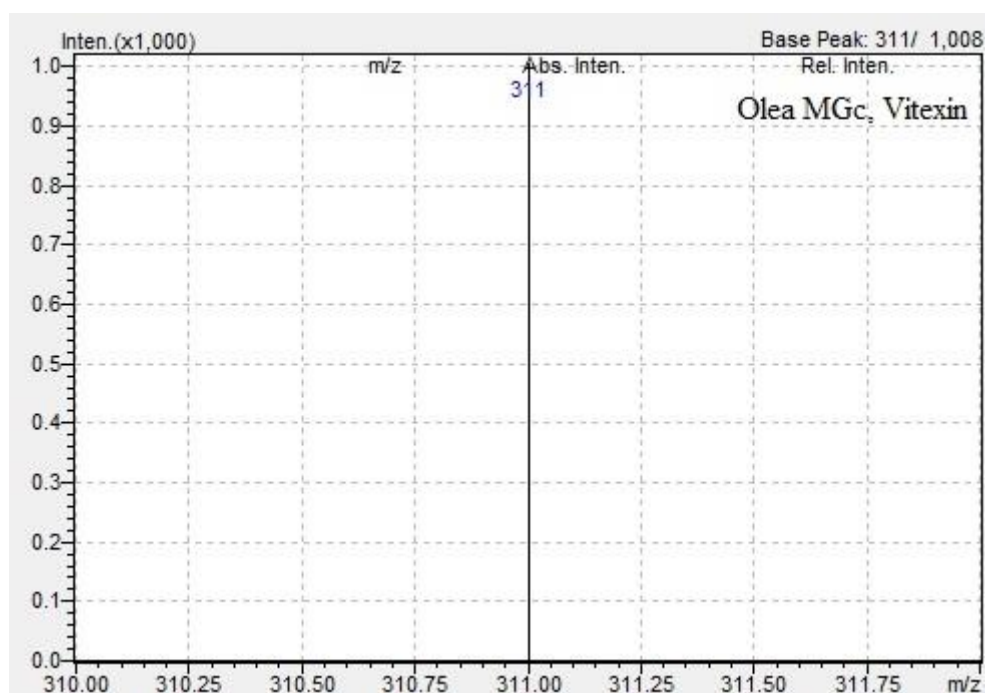

Figure S49. MS spectrum of vitexin obtained in the quantitative analysis of selected polyphenols of the O-GTE (olive)

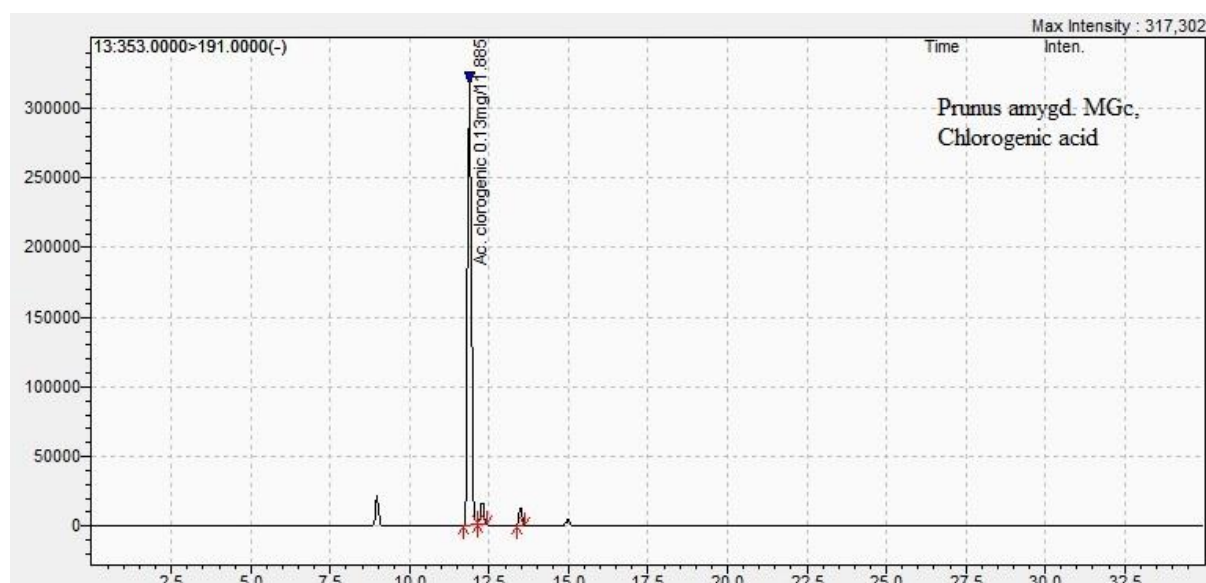

Figure S50. Chromatogram of chlorogenic acid obtained in the quantitative analysis of selected polyphenols of the SA-GTE (sweet almond)

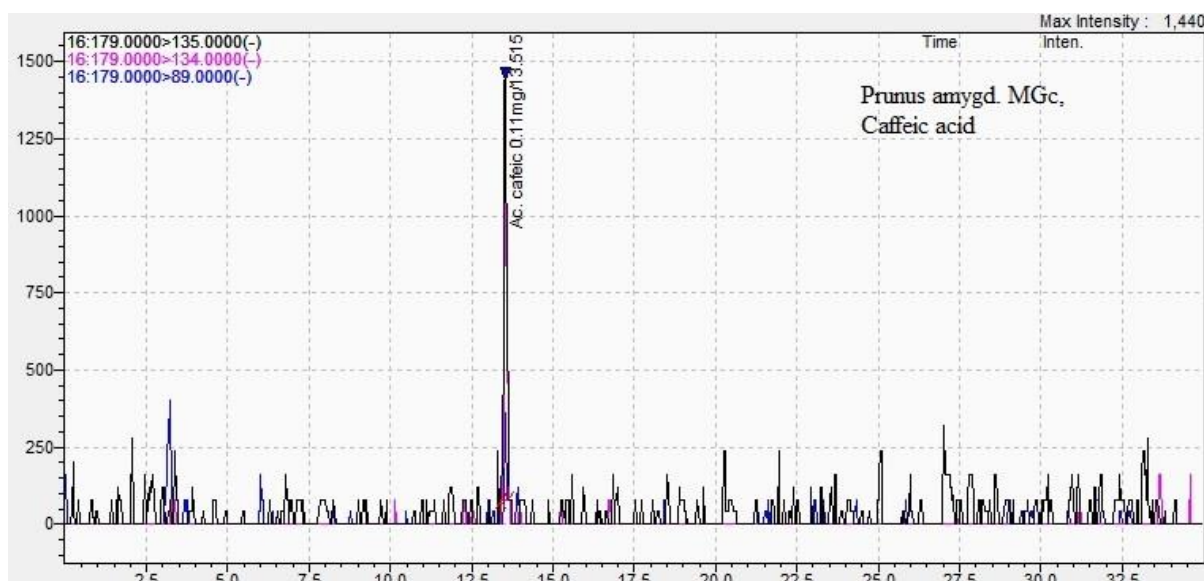

Figure S51. Chromatogram of caffeic acid obtained in the quantitative analysis of selected polyphenols of the SA-GTE (sweet almond)

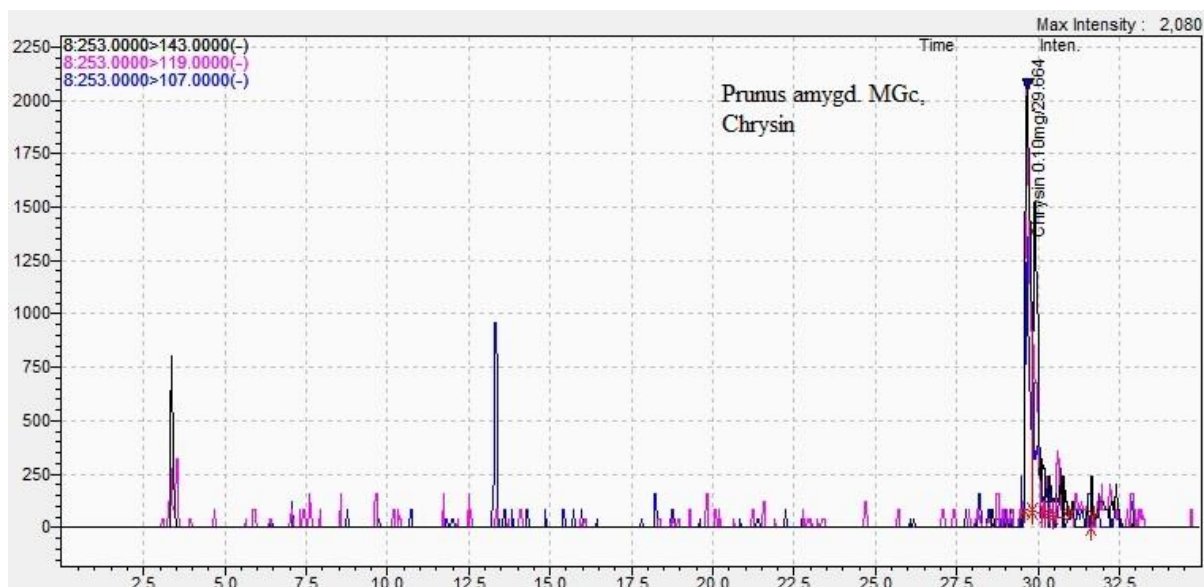

Figure S52. Chromatogram of chrysin obtained in the quantitative analysis of selected polyphenols of the SA-GTE (sweet almond)

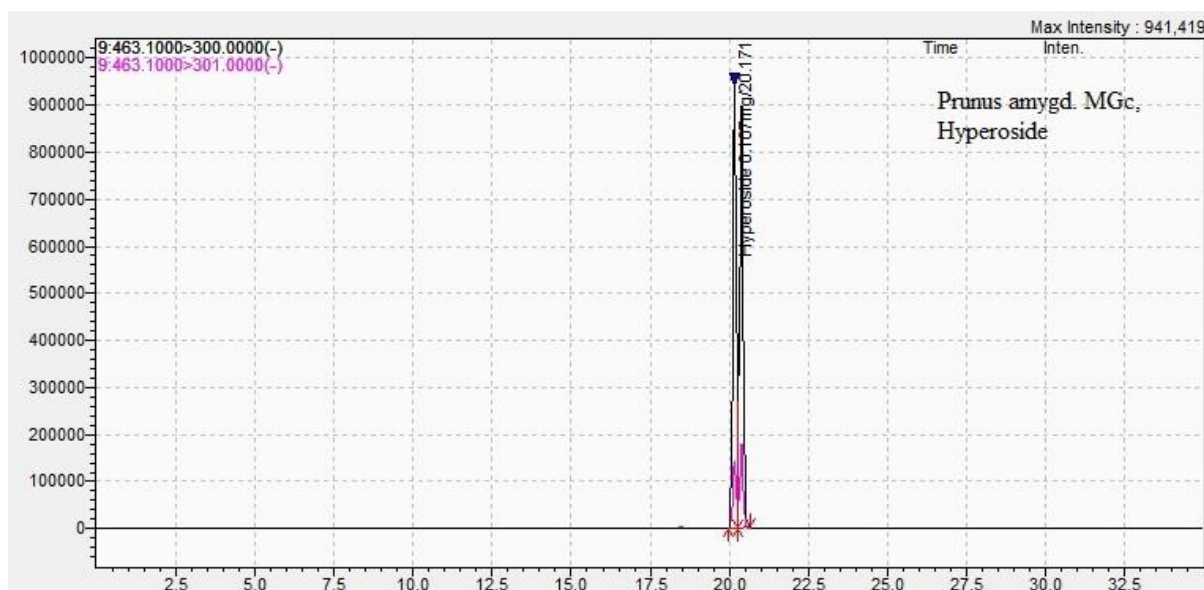

Figure S53. Chromatogram of hyperoside obtained in the quantitative analysis of selected polyphenols of the SA-GTE (sweet almond)

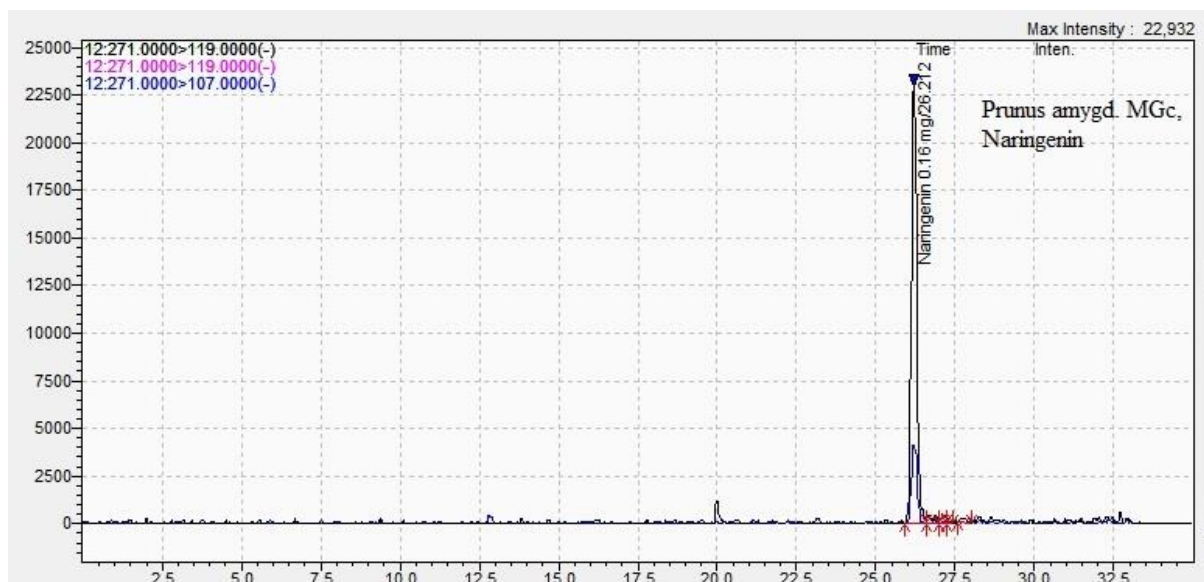

Figure S54. Chromatogram of naringenin obtained in the quantitative analysis of selected polyphenols of the SA-GTE (sweet almond)



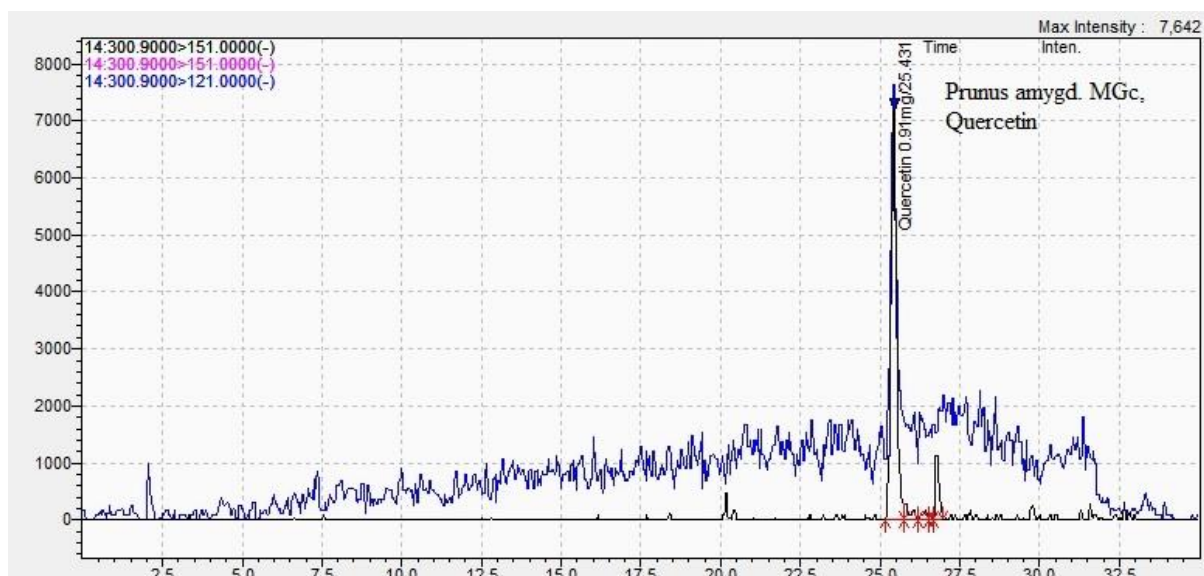

Figure S55. Chromatogram of quercetin obtained in the quantitative analysis of selected polyphenols of the SA-GTE (sweet almond)

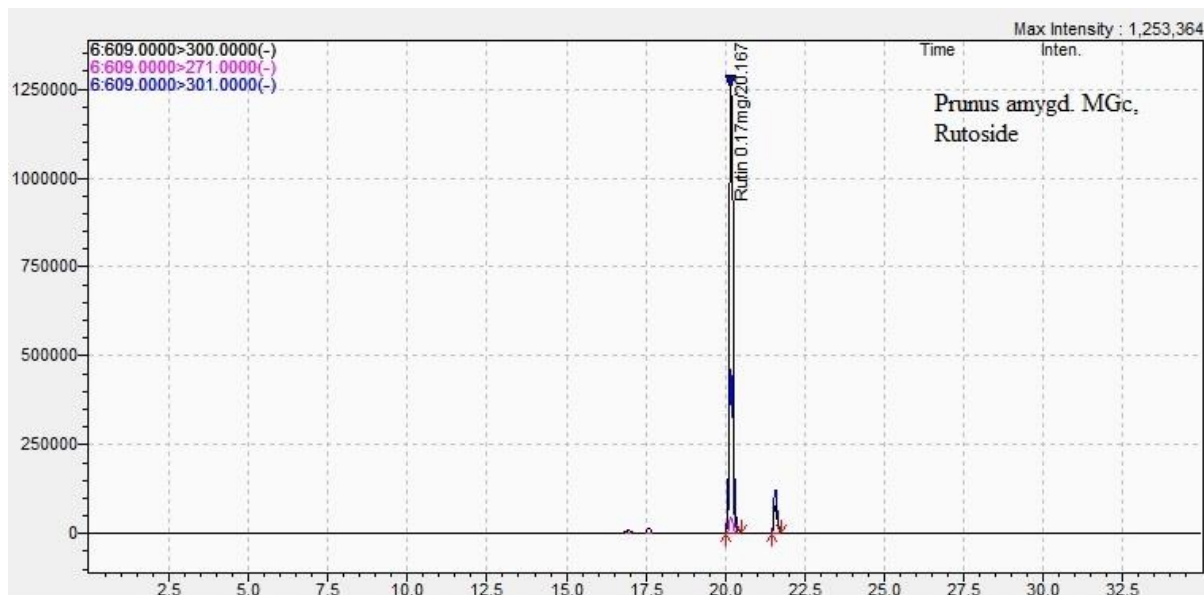

Figure S56. Chromatogram of rutoside obtained in the quantitative analysis of selected polyphenols of the SA-GTE (sweet almond)



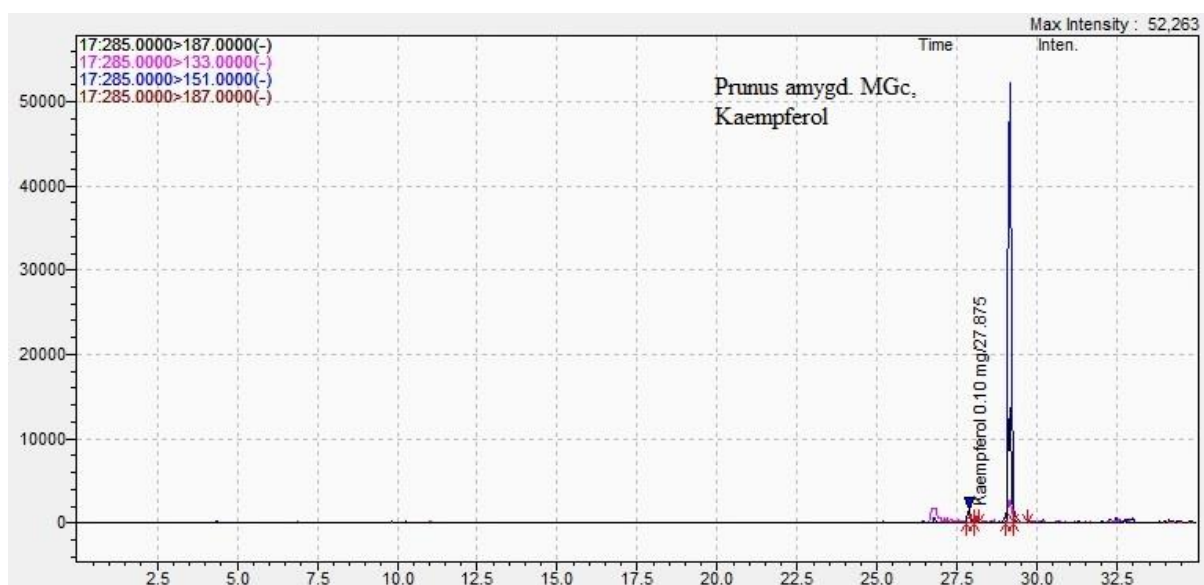

Figure S57. Chromatogram of kaempferol obtained in the quantitative analysis of selected polyphenols of the SA-GTE (sweet almond)

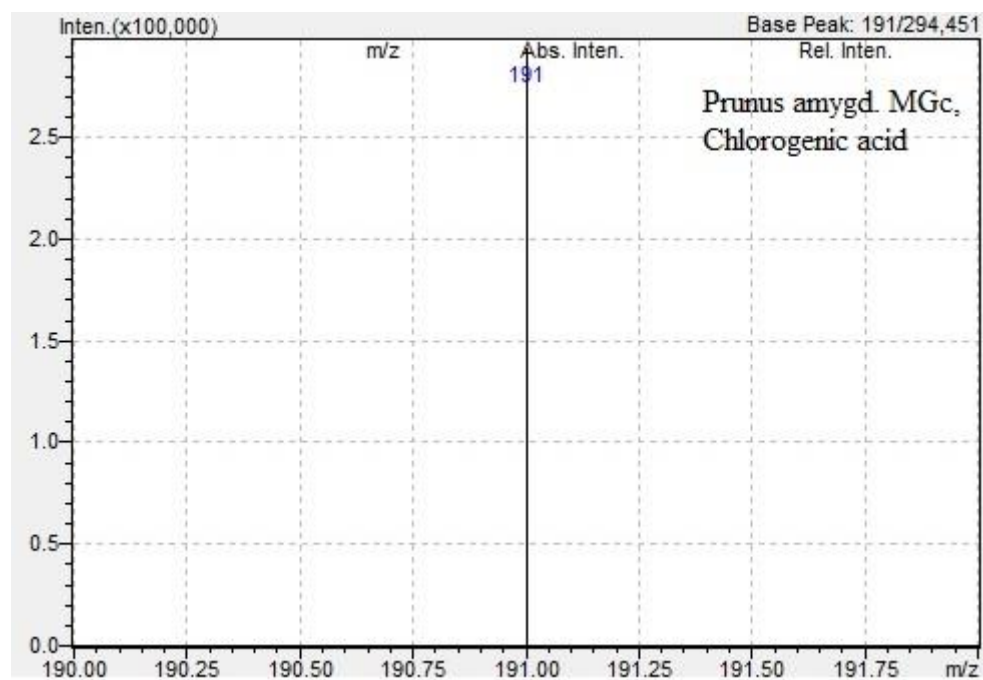

Figure S58. MS spectrum of chlorogenic acid obtained in the quantitative analysis of selected polyphenols of the SA-GTE (sweet almond)

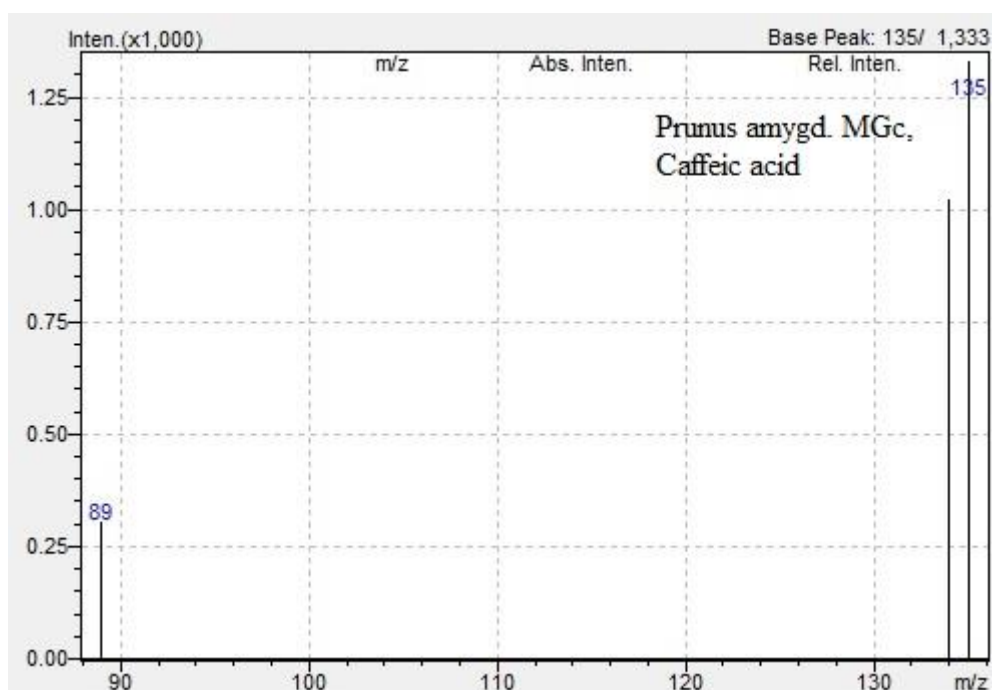

Figure S59. MS spectrum of caffeic acid obtained in the quantitative analysis of selected polyphenols of the SA-GTE (sweet almond)

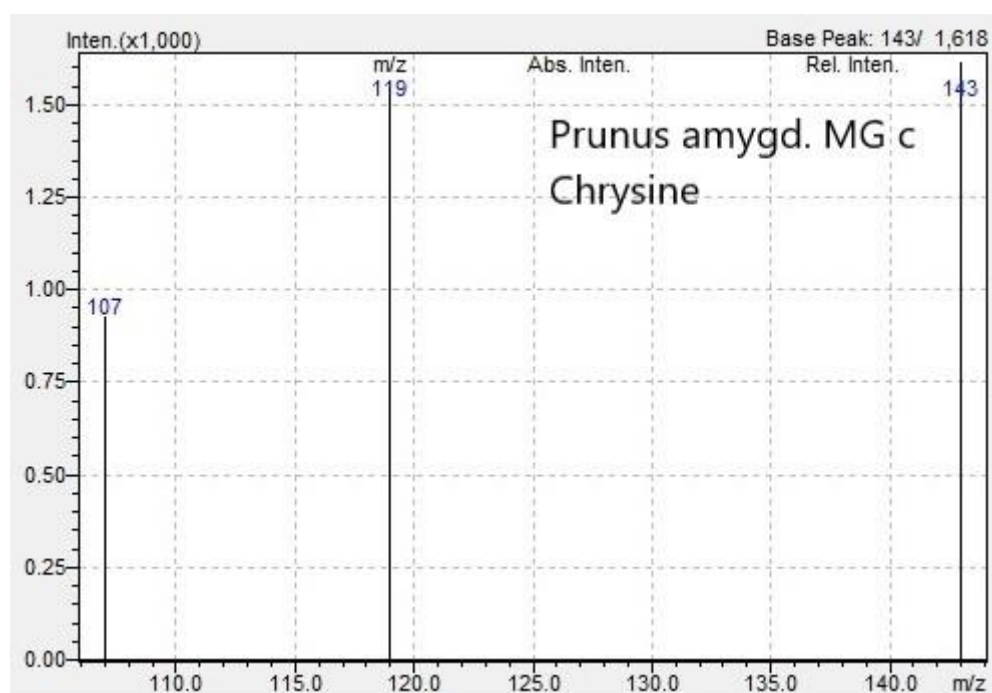

Figure S60. MS spectrum of chrysin obtained in the quantitative analysis of selected polyphenols of the SA-GTE (sweet almond)

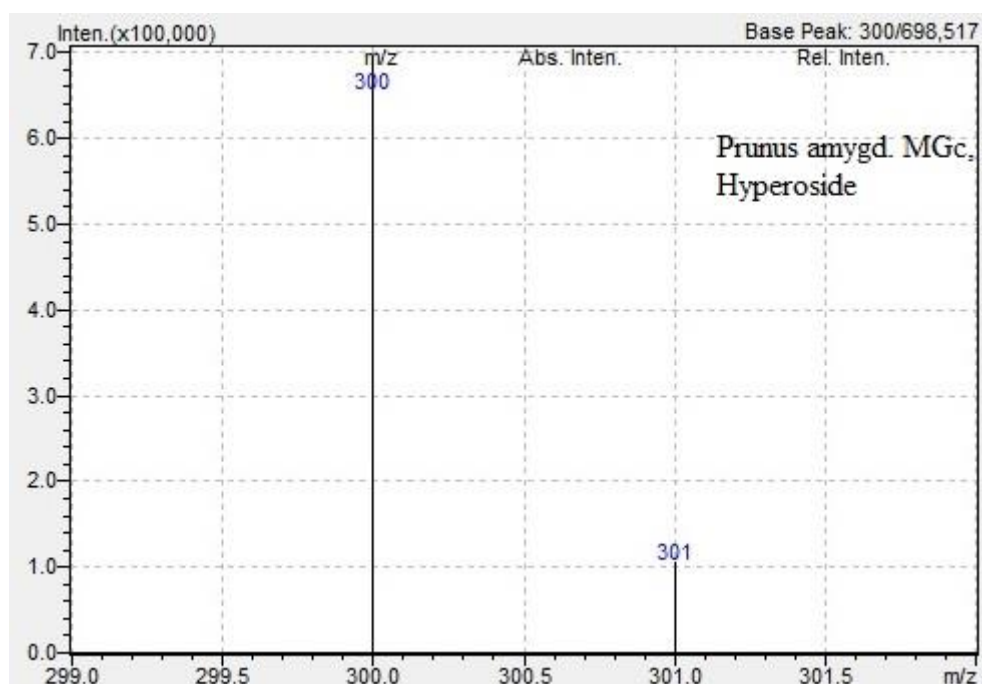

Figure S61. MS spectrum of hyperoside obtained in the quantitative analysis of selected polyphenols of the SA-GTE (sweet almond)

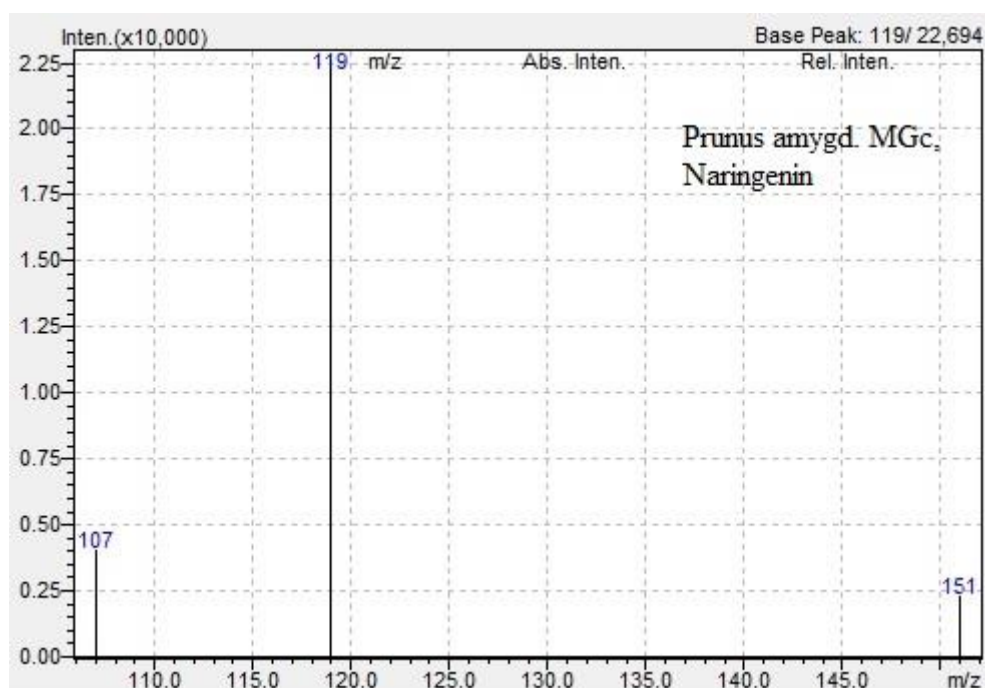

Figure S62. MS spectrum of naringenin obtained in the quantitative analysis of selected polyphenols of the SA-GTE (sweet almond)

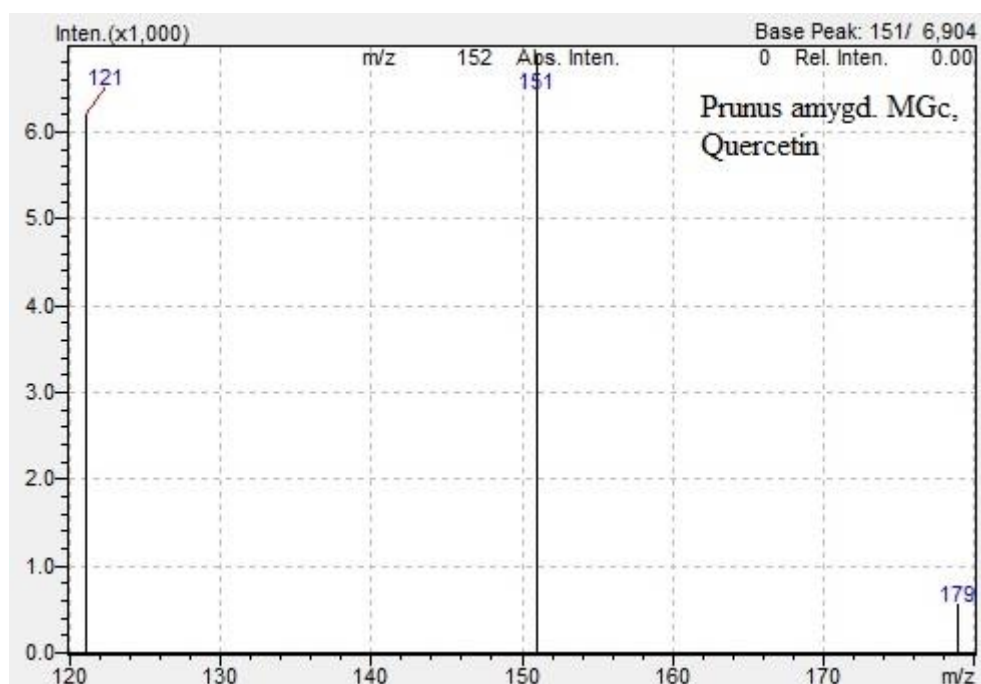

Figure S63. MS spectrum of quercetin obtained in the quantitative analysis of selected polyphenols of the SA-GTE (sweet almond)

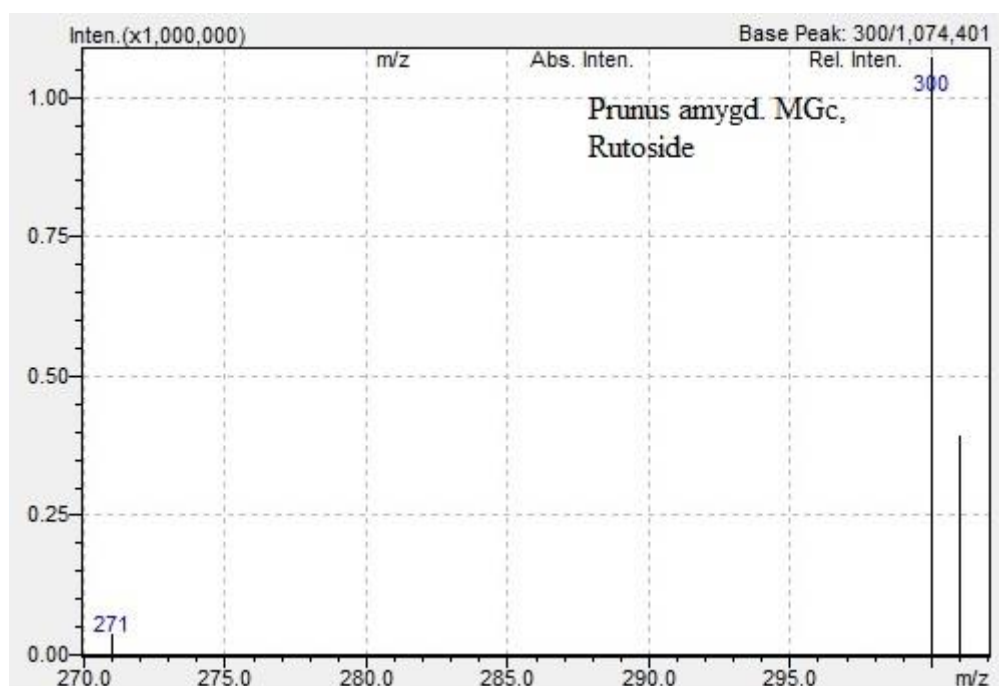

Figure S64. MS spectrum of rutoside obtained in the quantitative analysis of selected polyphenols of the SA-GTE (sweet almond)

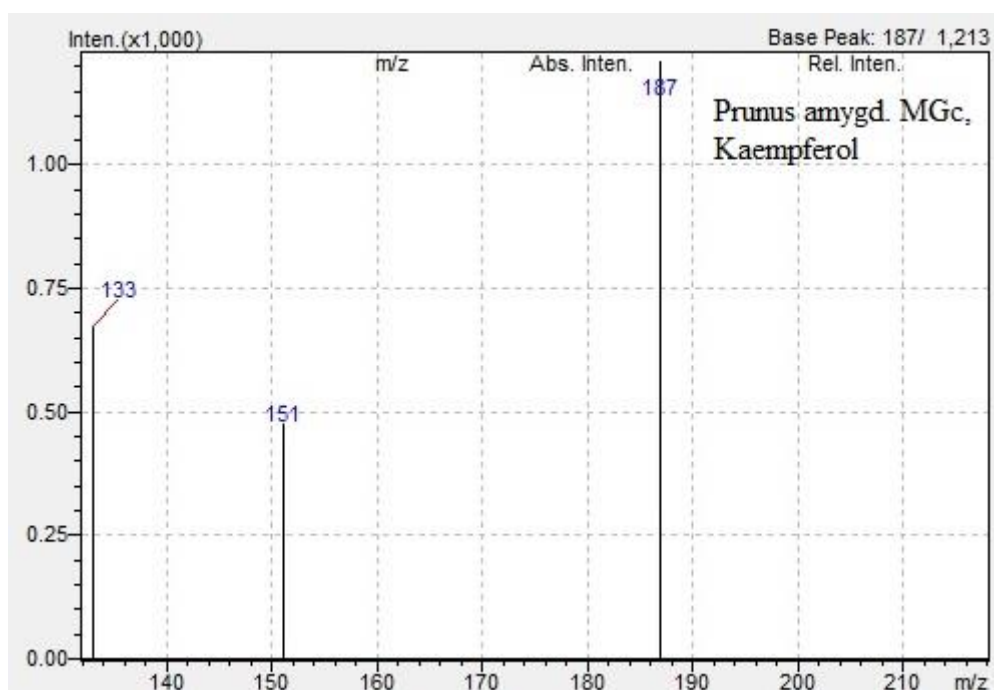

Figure S65. MS spectrum of kaempferol obtained in the quantitative analysis of selected polyphenols of the SA-GTE (sweet almond)

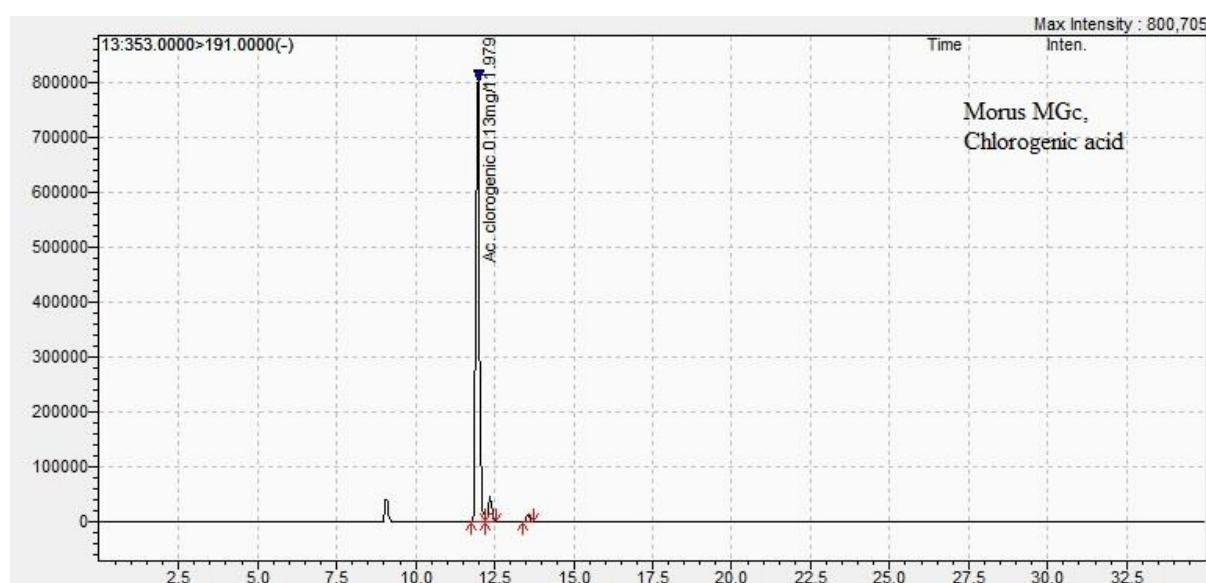

Figure S66. Chromatogram of chlorogenic acid obtained in the quantitative analysis of selected polyphenols of the BM-GTE (black mulberry)

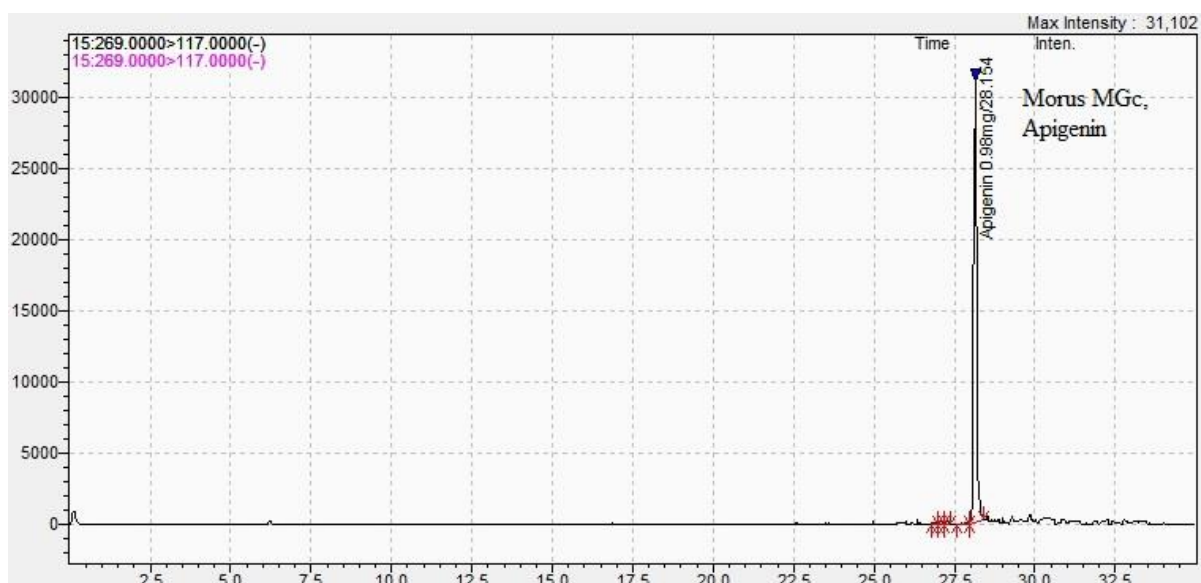

Figure S67. Chromatogram of apigenin obtained in the quantitative analysis of selected polyphenols of the BM-GTE (black mulberry)

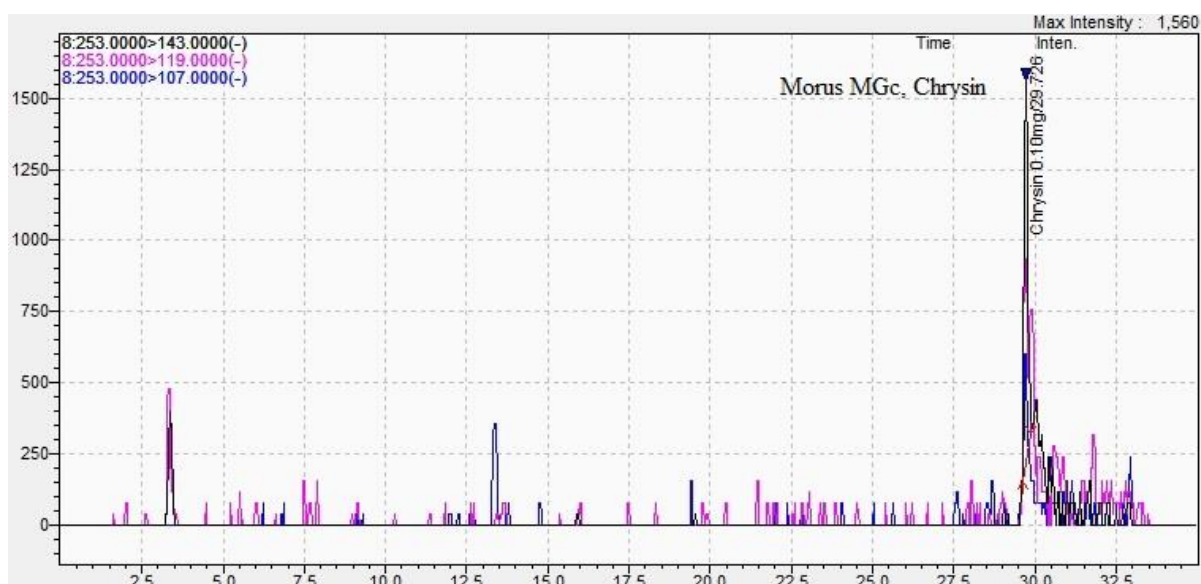

Figure S68. Chromatogram of chrysin obtained in the quantitative analysis of selected polyphenols of the BM-GTE (black mulberry)



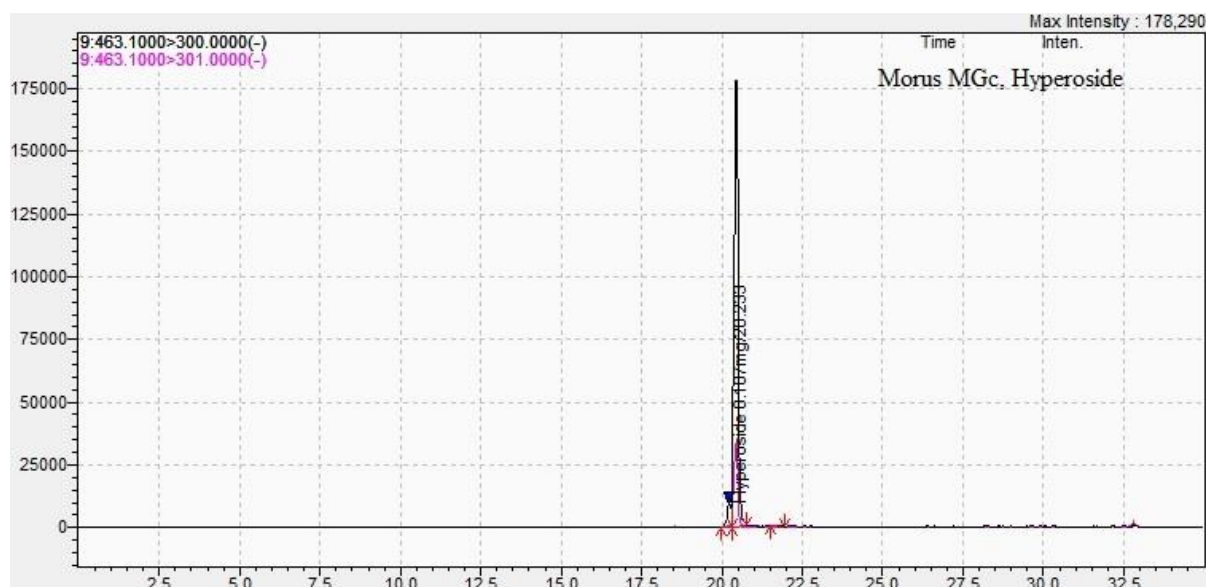

Figure S69. Chromatogram of hyperoside obtained in the quantitative analysis of selected polyphenols of the BM-GTE (black mulberry)

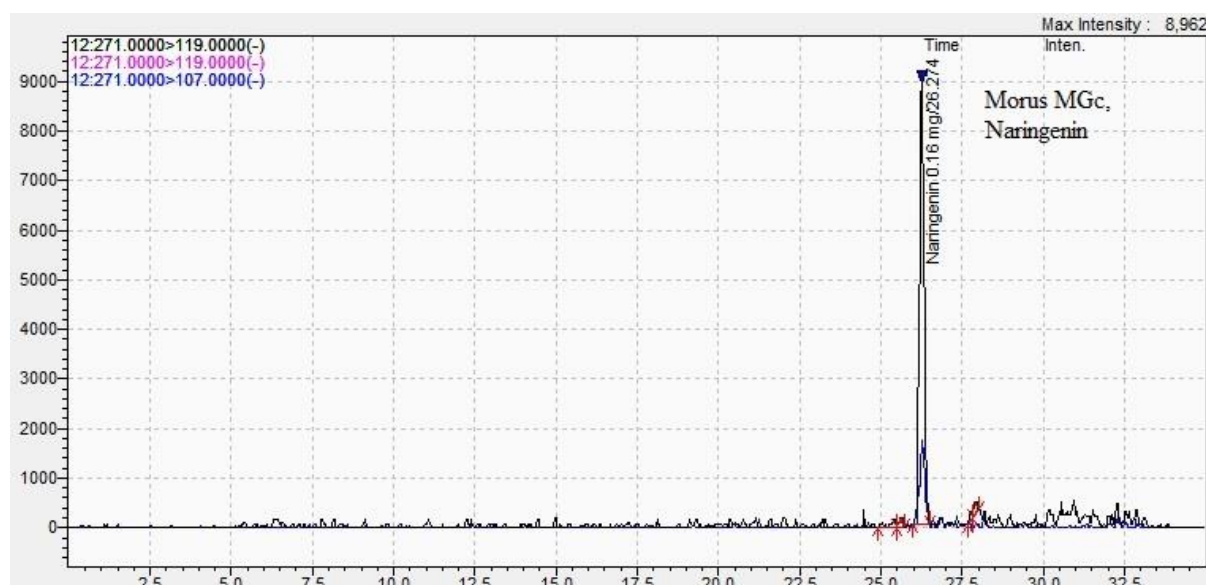

Figure S70. Chromatogram of naringenin obtained in the quantitative analysis of selected polyphenols of the BM-GTE (black mulberry)

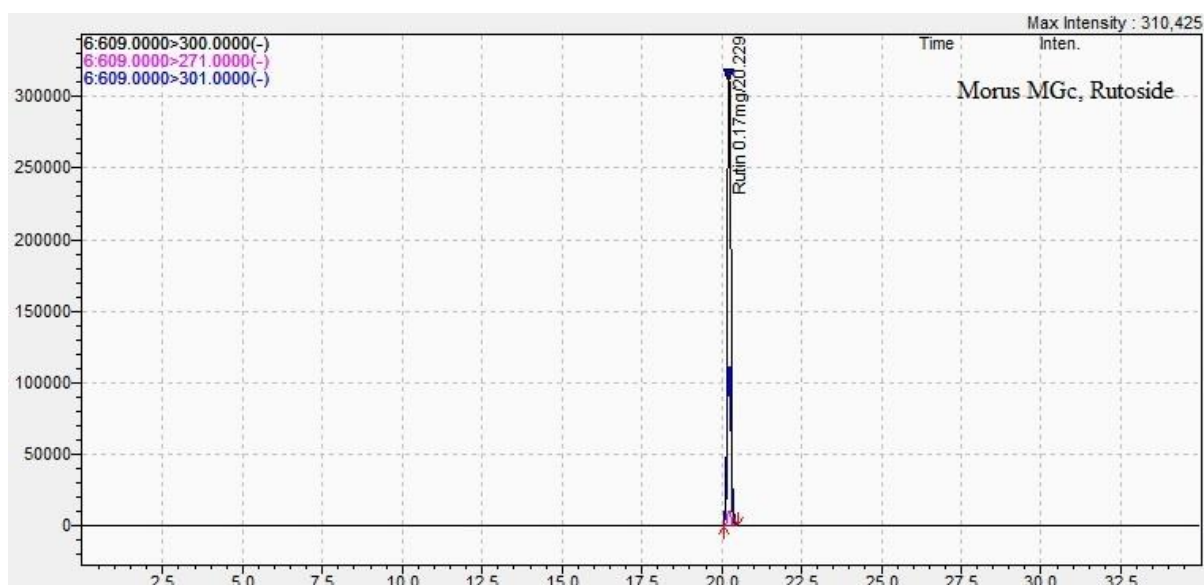

Figure S71. Chromatogram of rutoside obtained in the quantitative analysis of selected polyphenols of the BM-GTE (black mulberry)

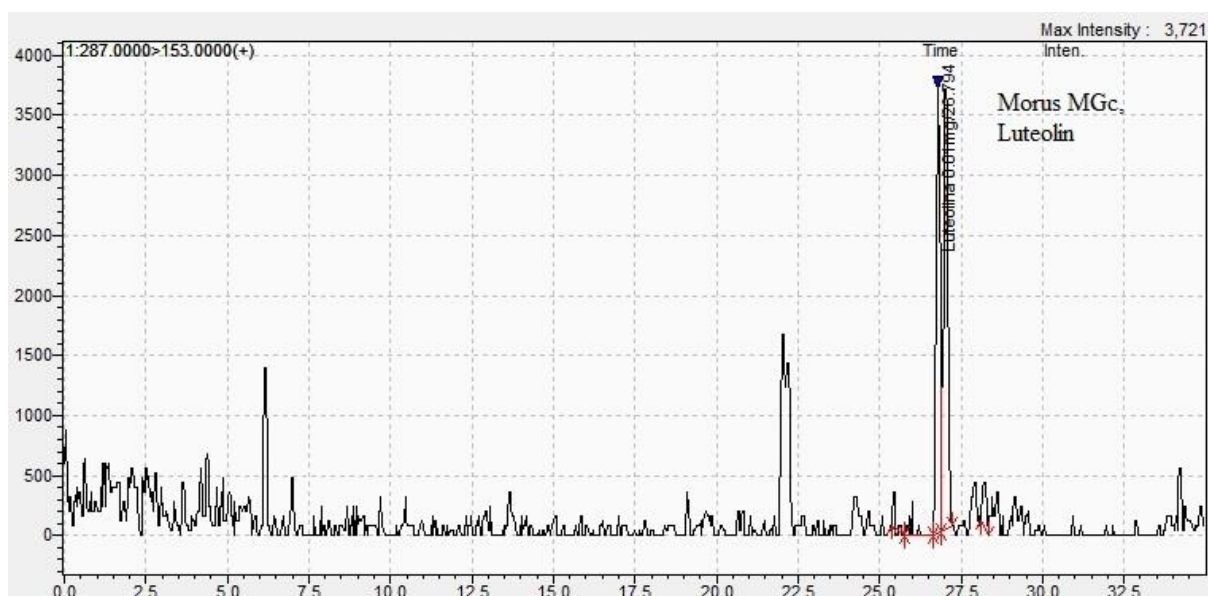

Figure S72. Chromatogram of luteolin obtained in the quantitative analysis of selected polyphenols of the BM-GTE (black mulberry)

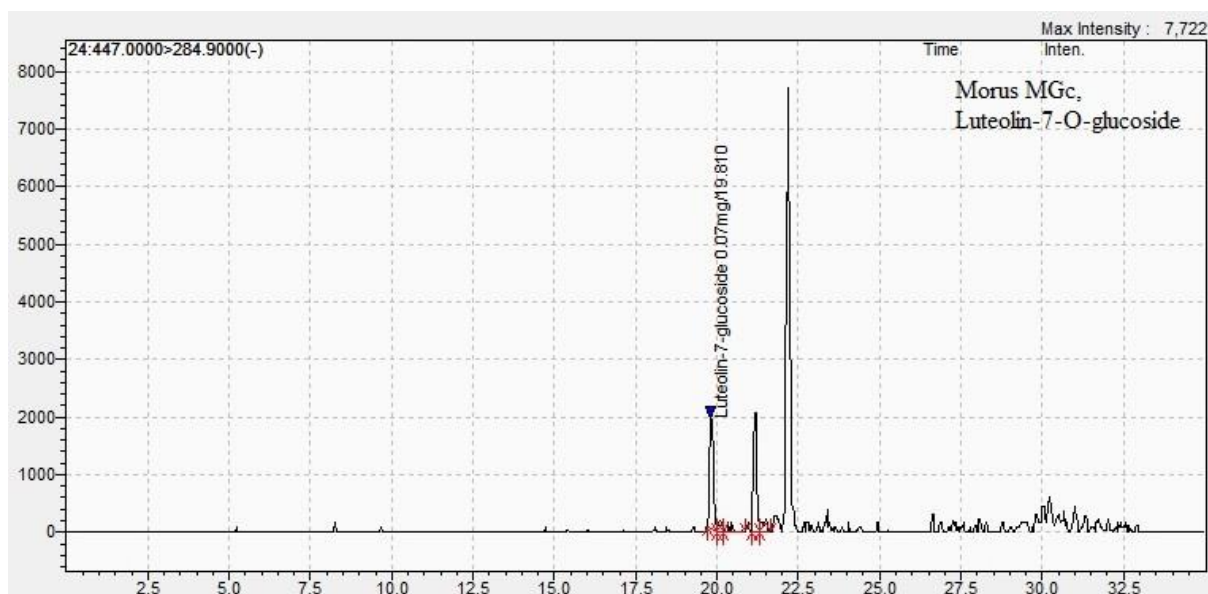

Figure S73. Chromatogram of luteolin-7-*o*-glucoside obtained in the quantitative analysis of selected polyphenols of the BM-GTE (black mulberry)

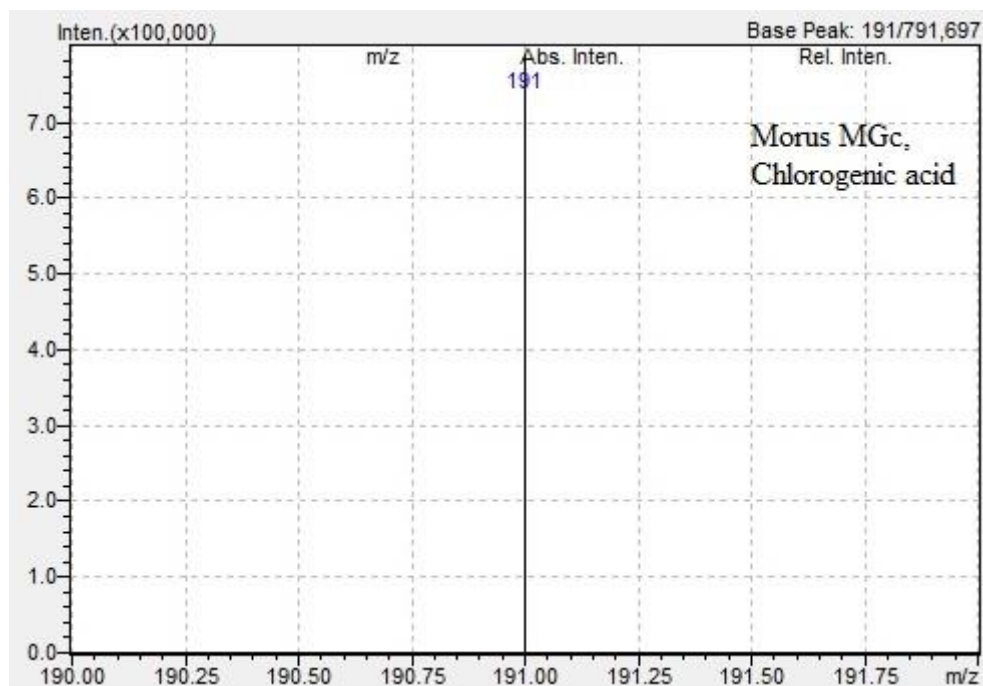

Figure S74. MS spectrum of chlorogenic acid obtained in the quantitative analysis of selected polyphenols of the BM-GTE (black mulberry)

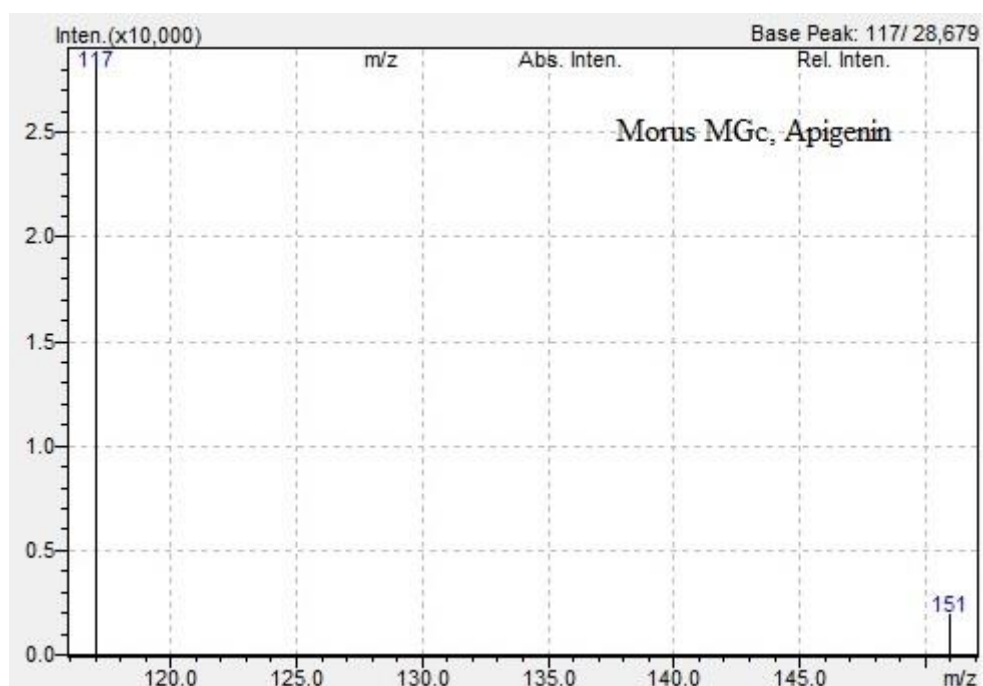

Figure S75. MS spectrum of apigenin obtained in the quantitative analysis of selected polyphenols of the BM-GTE (black mulberry)

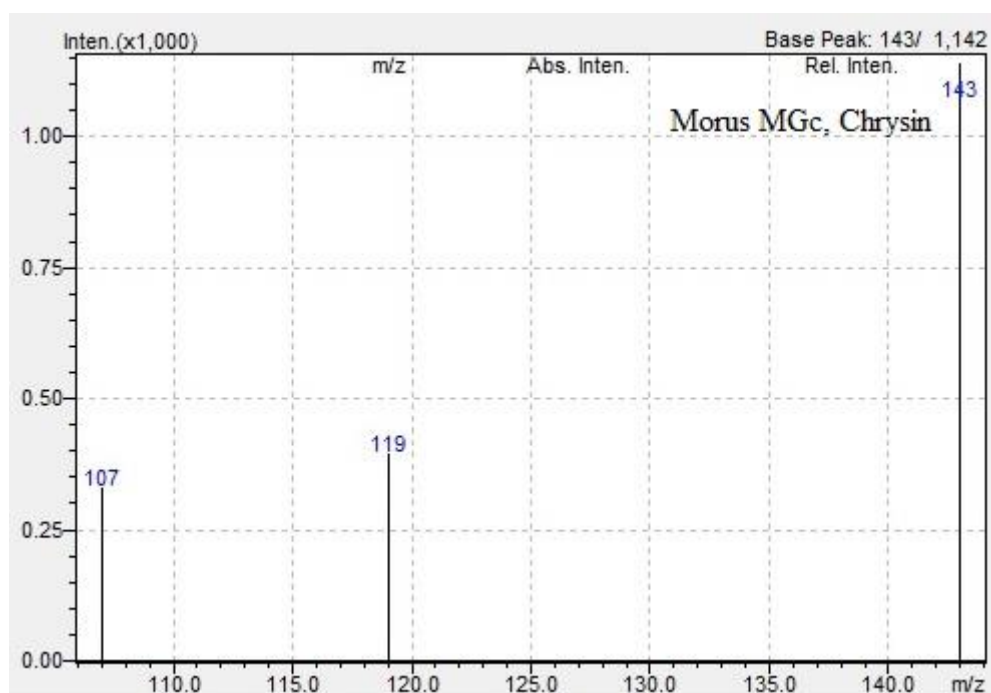

Figure S76. MS spectrum of chrysin obtained in the quantitative analysis of selected polyphenols of the BM-GTE (black mulberry)

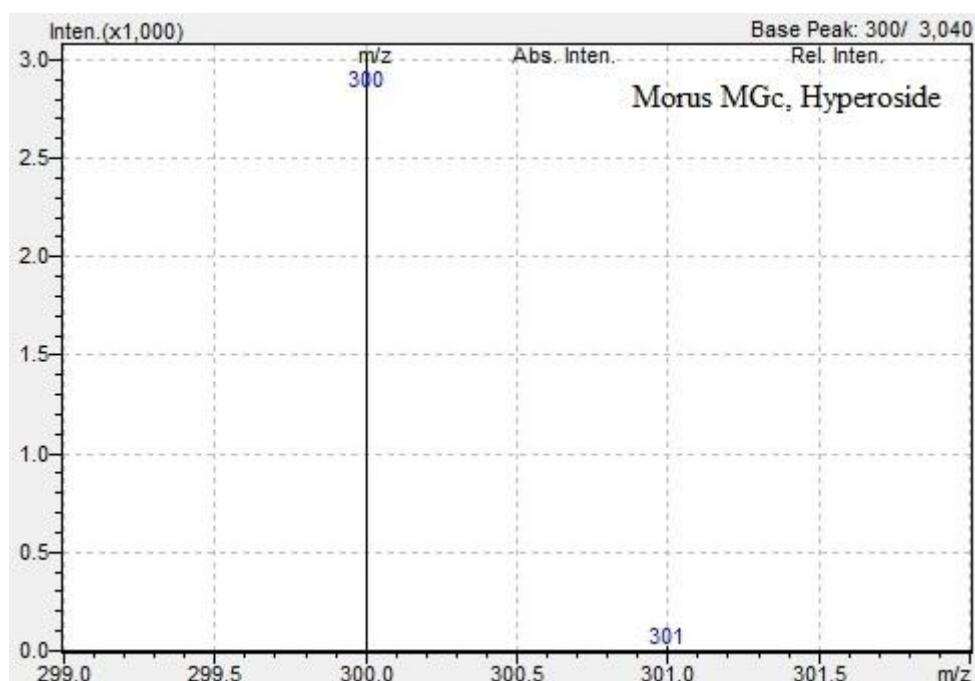

Figure S77. MS spectrum of hyperoside obtained in the quantitative analysis of selected polyphenols of the BM-GTE (black mulberry)

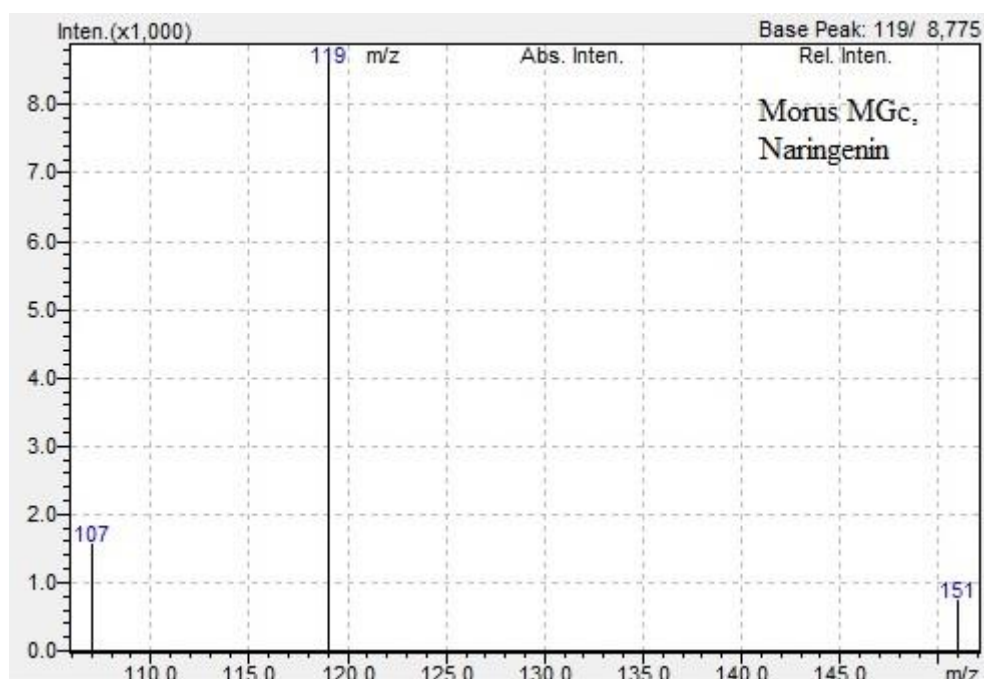

Figure S78. MS spectrum of naringenin obtained in the quantitative analysis of selected polyphenols of the BM-GTE (black mulberry)

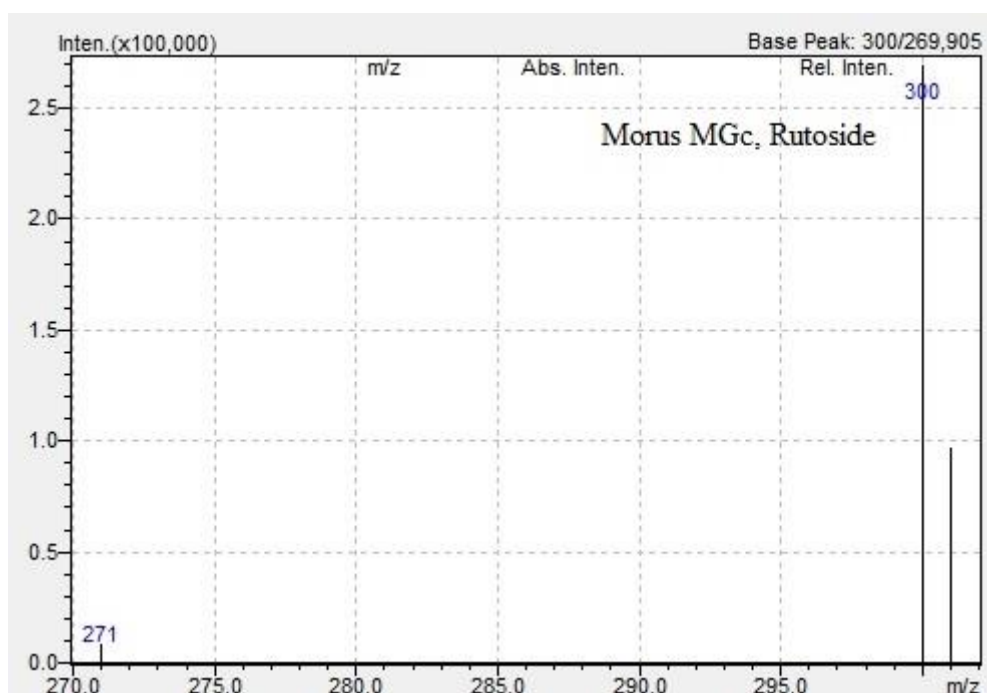

Figure S79. MS spectrum of rutoside obtained in the quantitative analysis of selected polyphenols of the BM-GTE (black mulberry)

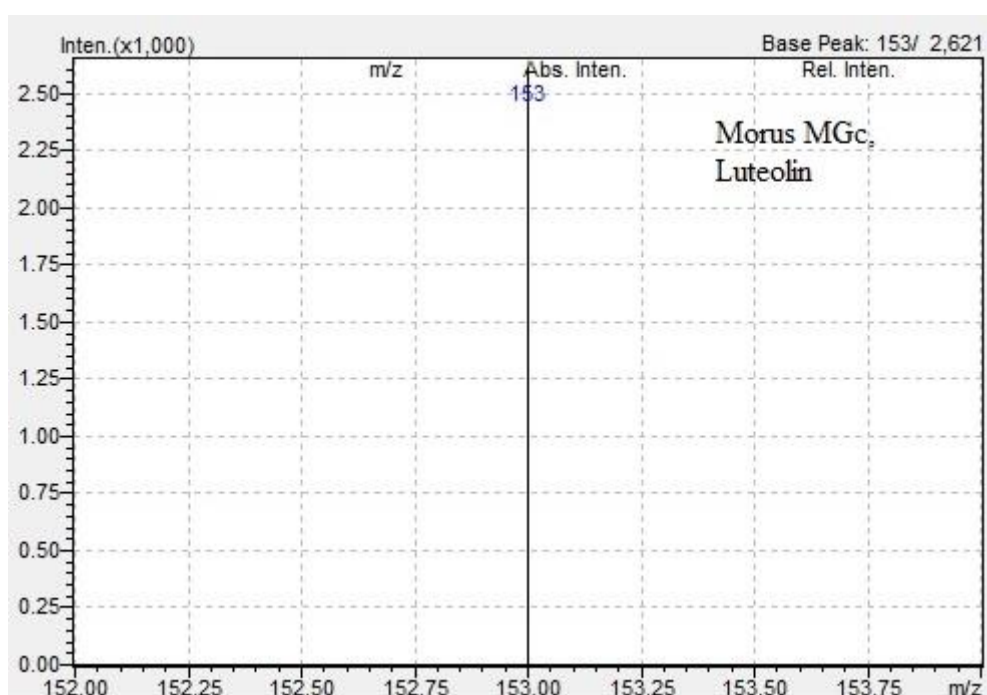

Figure S80. MS spectrum of luteolin obtained in the quantitative analysis of selected polyphenols of the BM-GTE (black mulberry)



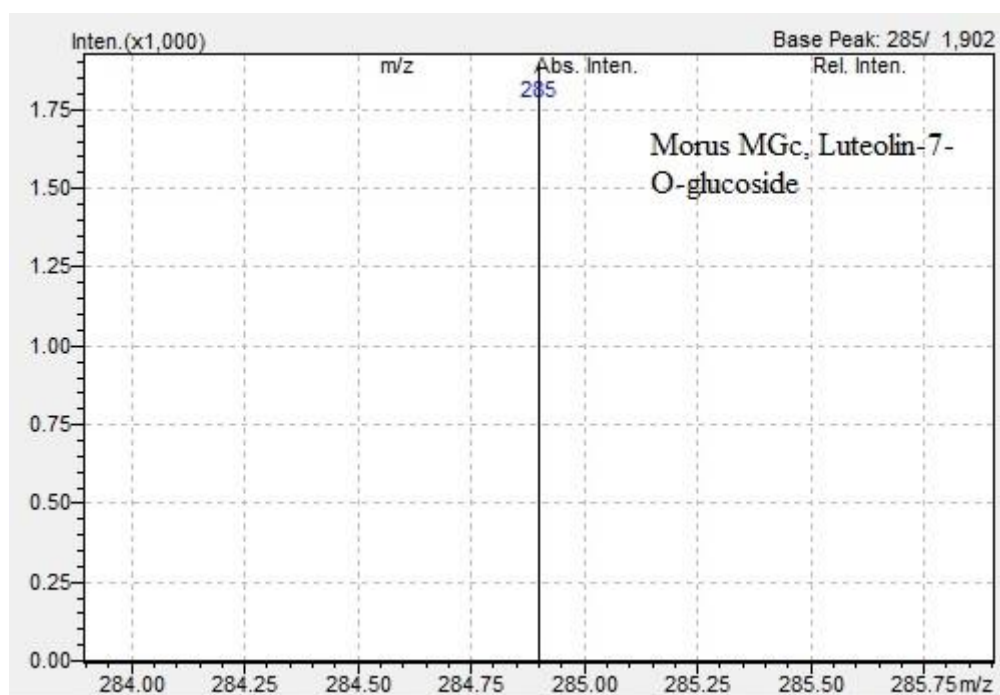

Figure S81. MS spectrum of luteolin-7-*o*-glucoside obtained in the quantitative analysis of selected polyphenols of the BM-GTE (black mulberry)

Table S1. Protocol of the quantitative analysis of GTE specific selected polyphenols by UHPLC-ESI-MS

| <b>Time, min</b> | <b>Methanol</b> | <b>Water</b> | <b>2 % formic acid in water</b> |
|------------------|-----------------|--------------|---------------------------------|
| 0.00             | 5               | 90           | 5                               |
| 3.00             | 15              | 70           | 15                              |
| 6.00             | 15              | 70           | 15                              |
| 9.00             | 21              | 58           | 21                              |
| 13.00            | 21              | 58           | 21                              |
| 18.00            | 30              | 41           | 29                              |
| 22.00            | 30              | 41           | 29                              |
| 26.00            | 50              | 0            | 50                              |
| 29.00            | 50              | 0            | 50                              |
| 29.01            | 5               | 90           | 5                               |
| 35.00            | 5               | 90           | 5                               |

Table S2. The phytonutrient profile of O-GTE (olive)

| No. | Compound type        | Phytonutrient                                                 | RT    | M [+]     | M [-]     |
|-----|----------------------|---------------------------------------------------------------|-------|-----------|-----------|
| 1   | Vitamin              | Adenine (B4)                                                  | 1.29  | 136.06233 |           |
| 2   | Vitamin              | Nicotinamide                                                  | 1.40  | 123.05584 |           |
| 3   | Vitamin              | Nicotinic acid (Niacin,B3)                                    | 1.40  | 124.03986 |           |
| 4   | Polyphenol           | Hydroxytyrosol (3,4-Dihydroxyphenylethanol)                   | 5.34  |           | 153.05517 |
| 5   | Polyphenol           | Dihydroxycoumarin-O-hexoside                                  | 12.24 | 341.08726 |           |
| 6   | Carboxylic acid      | Kynurenic acid                                                | 13.18 | 190.05042 |           |
| 7   | Polyphenol           | Esculetin (6,7-dihydroxycoumarin)                             | 14.04 |           | 179.03444 |
| 8   | Polyphenol           | Chlorogenic acid (3-O-Caffeoylquinic acid)                    | 14.28 | 355.10291 |           |
| 9   | Iridoid              | Oleoside                                                      | 16.88 |           | 389.10839 |
| 10  | Flavonoid            | Quercetin-di-O-hexoside                                       | 17.17 |           | 625.14048 |
| 11  | Carboxylic acid      | 12-Hydroxyjasmonic acid glucoside or Tuberonic acid glucoside | 17.59 |           | 387.16551 |
| 12  | Carboxylic acid      | 12-Hydroxyjasmonic acid or Tuberonic acid                     | 18.26 |           | 225.11269 |
| 13  | Polyphenol           | Scopoletin (7-Hydroxy-6-methoxycoumarin)                      | 18.55 | 193.05009 |           |
| 14  | Flavonoid            | Taxifolin (Dihydroquercetin)                                  | 19.32 |           | 303.05048 |
| 15  | Iridoid              | Neonuzhenide                                                  | 21.54 |           | 701.22929 |
| 16  | Iridoid              | Nuzhenide dihydroxyphenylacetic acid isomer                   | 21.66 |           | 715.20856 |
| 17  | Flavonoid            | Dihydrokaempferol (Aromadendrin, Katuranin)                   | 21.92 |           | 287.05557 |
| 18  | Polyphenol           | Verbascoside                                                  | 22.01 |           | 623.19760 |
| 19  | Flavonoid            | Luteolin-7-O-glucoside (Cynaroside)                           | 22.36 |           | 447.09274 |
| 20  | Flavonoid            | Luteolin-O-rutinoside isomer                                  | 22.45 |           | 593.15065 |
| 21  | Lignan<br>Polyphenol | 8-Acetoxypinoresinol-4-O-glucoside                            | 22.75 |           | 577.19212 |
| 22  | Iridoid              | Oleuropein hexoside isomer 1                                  | 22.89 |           | 701.22929 |
| 23  | Flavonoid            | Isoquercitrin (Hirsutrin, Quercetin-3-O-glucoside)            | 22.93 |           | 463.08765 |
| 24  | Flavonoid            | Rutin (Quercetin-3-O-rutinoside)                              | 23.00 | 611.16122 |           |
| 25  | Flavonoid            | Luteolin-7-O-rutinoside (Scolymoside)                         | 23.07 |           | 593.15065 |
| 26  | Iridoid              | Nuzhenide                                                     | 23.07 |           | 685.23438 |

|    |                      |                                                   |       |           |           |
|----|----------------------|---------------------------------------------------|-------|-----------|-----------|
| 27 | Iridoid              | Oleuropein hexoside isomer 2                      | 23.32 |           | 701.22929 |
| 28 | Lignan<br>Polyphenol | 8-Hydroxypinoresinol-4-O or 4'-O-glucoside        | 23.37 |           | 535.18156 |
| 29 | Flavonoid            | Cosmosiin (Apigetrin, Apigenin-7-O-glucoside)     | 23.98 | 433.11347 |           |
| 30 | Iridoid              | Oleuropein hexoside isomer 3                      | 24.07 |           | 701.22929 |
| 31 | Flavonoid            | Chrysoeriol-O-hexoside                            | 24.25 |           | 461.10839 |
| 32 | Iridoid              | Oleuropein                                        | 24.57 |           | 539.17647 |
| 33 | Flavonoid            | Luteolin-3'-O-glucoside or Luteolin-5-O-glucoside | 24.67 |           | 447.09274 |
| 34 | Flavonoid            | Luteolin-4'-O-glucoside                           | 25.89 |           | 447.09274 |
| 35 | Iridoid              | Ligstroside (Ligustroside)                        | 26.44 |           | 523.18156 |
| 36 | Flavonoid            | Quercetin                                         | 26.99 | 303.05048 |           |
| 37 | Flavonoid            | Naringenin                                        | 27.21 |           | 271.06065 |
| 38 | Flavonoid            | Luteolin (3',4',5,7-Tetrahydroxyflavone)          | 27.85 |           | 285.03991 |
| 39 | Flavonoid            | Scutellarein-7-O-(6-O-feruloyl)glucoside          | 28.79 |           | 623.14009 |
| 40 | Flavonoid            | Apigenin                                          | 29.67 |           | 269.04450 |
| 41 | Flavonoid            | Isorhamnetin                                      | 29.84 |           | 315.05048 |
| 42 | Flavonoid            | Chrysoeriol                                       | 29.90 |           | 299.05556 |
| 43 | Flavonoid            | Pinocembrin (5,7-Dihydroxyflavanone)              | 32.25 |           | 255.06573 |
| 44 | Terpenoid            | Uvaol                                             | 45.11 | 443.38891 |           |
| 45 | Carboxylic acid      | Ginkgoic acid                                     | 47.40 |           | 345.24298 |

Table S3. The phytonutrient profile of SA-GTE (sweet almond)

| No. | Compound type   | Phytonutrient                              | RT    | M [+]     | M [-]     |
|-----|-----------------|--------------------------------------------|-------|-----------|-----------|
| 1   | Amino acid      | Lysine                                     | 1.09  | 147.11336 |           |
| 2   | Alkaloid        | Choline                                    | 1.18  | 104.10754 |           |
| 3   | Amino acid      | Arginine                                   | 1.22  | 175.11951 |           |
| 4   | Carboxylic acid | Quinic acid                                | 1.24  |           | 191.05557 |
| 5   | Amino acid      | $\gamma$ -Aminobutyric acid                | 1.24  | 104.07116 |           |
| 6   | Amino acid      | Aspartic acid                              | 1.27  | 134.04534 |           |
| 7   | Amino acid      | Methionine sulfoxide                       | 1.27  | 166.05379 |           |
| 8   | Amino acid      | Proline                                    | 1.27  | 116.07116 |           |
| 9   | Amino acid      | Serine                                     | 1.27  | 106.05042 |           |
| 10  | Amino acid      | Threonine                                  | 1.27  | 120.06607 |           |
| 11  | Amino acid      | Asparagine                                 | 1.29  | 133.06132 |           |
| 12  | Amino acid      | Glutamic acid                              | 1.29  | 148.06099 |           |
| 13  | Vitamin         | Adenine (B4)                               | 1.30  | 136.06233 |           |
| 14  | Carboxylic acid | Malic acid                                 | 1.32  |           | 133.01370 |
| 15  | Vitamin         | Nicotinic acid (Niacin,B3)                 | 1.40  | 124.03986 |           |
| 16  | Carboxylic acid | Citric acid                                | 1.41  |           | 191.01918 |
| 17  | Vitamin         | Nicotinamide                               | 1.41  | 123.05584 |           |
| 18  | Amino acid      | Isoleucine                                 | 1.54  | 132.10246 |           |
| 19  | Amino acid      | Leucine                                    | 1.90  | 132.10246 |           |
| 20  | Amino acid      | Phenylalanine                              | 3.25  | 166.08681 |           |
| 21  | Others          | 2-Oxindole                                 | 4.00  | 134.06060 |           |
| 22  | Carbohydrate    | Benzyl-glucoside                           | 10.39 |           | 269.10252 |
| 23  | Polyphenol      | Coumaroylquinic acid isomer 1              | 11.96 |           | 337.09235 |
| 24  | Polyphenol      | 5-O-(4-Coumaroyl)quinic acid               | 12.60 |           | 337.09235 |
| 25  | Polyphenol      | Vanilloylglucose isomer 1                  | 13.64 |           | 329.08726 |
| 26  | Polyphenol      | Vanilloylglucose isomer 2                  | 14.08 |           | 329.08726 |
| 27  | Polyphenol      | Coumaroylglucose isomer 1                  | 14.18 |           | 325.09235 |
| 28  | Polyphenol      | Chlorogenic acid (3-O-Caffeoylquinic acid) | 14.28 | 355.10291 |           |

|    |              |                                                        |       |           |           |
|----|--------------|--------------------------------------------------------|-------|-----------|-----------|
| 29 | Polyphenol   | 3-O-Feruloylquinic acid                                | 14.57 |           | 367.10291 |
| 30 | Polyphenol   | trans-Melilotoside (trans-Glucosyl-2-hydroxycinnamate) | 14.68 |           | 325.09235 |
| 31 | Polyphenol   | Coumaroylglucose isomer 2                              | 15.11 |           | 325.09235 |
| 32 | Polyphenol   | Chryptochlorogenic acid (4-O-Caffeoylquinic acid)      | 15.61 | 355.10291 |           |
| 33 | Polyphenol   | 3-O-(4-Coumaroyl)quinic acid                           | 15.67 |           | 337.09235 |
| 34 | Polyphenol   | Vanilloylglucose isomer 3                              | 16.15 |           | 329.08726 |
| 35 | Carbohydrate | Benzyl-primeveroside                                   | 16.56 |           | 401.14478 |
| 36 | Polyphenol   | Coumaroylquinic acid isomer 2                          | 16.87 |           | 337.09235 |
| 37 | Polyphenol   | 4-O-(4-Coumaroyl)quinic acid                           | 17.55 |           | 337.09235 |
| 38 | Flavonoid    | Quercetin-3-O-rutinoside-7-O-glucoside                 | 17.59 |           | 771.19839 |
| 39 | Polyphenol   | 4-Coumaric acid                                        | 17.85 |           | 163.03952 |
| 40 | Polyphenol   | 5-O-Feruloylquinic acid                                | 18.01 |           | 367.10291 |
| 41 | Polyphenol   | 4-O-Feruloylquinic acid                                | 18.56 |           | 367.10291 |
| 42 | Aldehyd      | Indole-4-carbaldehyde                                  | 19.04 | 146.06059 |           |
| 43 | Flavonoid    | Kaempferol-O-(rahymnosyl)hexoside-O-hexoside           | 19.09 |           | 755.20347 |
| 44 | Polyphenol   | Coumaroylquinic acid isomer 3                          | 19.19 |           | 337.09235 |
| 45 | Flavonoid    | Taxifolin (Dihydroquercetin)                           | 19.33 |           | 303.05048 |
| 46 | Polyphenol   | Ferulic acid                                           | 19.35 |           | 193.05009 |
| 47 | Flavonoid    | Quercetin-O-(hexosyl)rutinoside                        | 19.82 |           | 771.19839 |
| 48 | Flavonoid    | Quercetin-O-dihexoside isomer 1                        | 19.96 |           | 625.14048 |
| 49 | Alkaloid     | Chelidonine                                            | 20.05 | 354.13415 |           |
| 50 | Flavonoid    | Quercetin-O-dihexoside isomer 2                        | 20.20 |           | 625.14048 |
| 51 | Flavonoid    | Tetrahydroxyflavanone-O-hexoside isomer 1              | 20.35 |           | 449.10839 |
| 52 | Polyphenol   | Isoferulic acid                                        | 20.41 |           | 193.05009 |
| 53 | Flavonoid    | Myricetin-O-hexoside                                   | 20.91 |           | 479.08257 |
| 54 | Flavonoid    | Kaempferol-O-(hexosyl)hexoside                         | 21.47 |           | 609.14556 |
| 55 | Flavonoid    | Dihydrokaempferol (Aromadendrin, Katuranin)            | 21.94 |           | 287.05557 |
| 56 | Alkaloid     | Berberine                                              | 22.33 | 336.12358 |           |
| 57 | Flavonoid    | Prunin (Naringenin-7-O-glucoside)                      | 22.38 |           | 433.11347 |



|    |            |                                                          |       |           |           |
|----|------------|----------------------------------------------------------|-------|-----------|-----------|
| 58 | Flavonoid  | Tetrahydroxyflavanone-O-hexoside isomer 2                | 22.46 |           | 449.10839 |
| 59 | Flavonoid  | Hyperoside (Quercetin-3-O-galactoside, Hyperin)          | 22.69 |           | 463.08765 |
| 60 | Flavonoid  | Isoquercitrin (Hirsutrin, Quercetin-3-O-glucoside)       | 22.89 |           | 463.08765 |
| 61 | Flavonoid  | Rutin (Quercetin-3-O-rutinoside)                         | 23.02 | 611.16122 |           |
| 62 | Flavonoid  | Reinutrin (Reynoutrin, Quercetin-3-O-xyloside)           | 23.25 |           | 433.07709 |
| 63 | Flavonoid  | Avicularin (Quercetin-3-O-arabinofuranoside, Fencularin) | 23.50 |           | 433.07709 |
| 64 | Flavonoid  | Quercetin-3-O-(6"-malonyl)glucoside                      | 23.68 |           | 549.08805 |
| 65 | Other      | Eugenol ( 4-Allyl-2-methoxyphenol)                       | 23.81 | 165.09156 |           |
| 66 | Flavonoid  | Tetrahydroxyflavanone-O-hexoside isomer 3                | 23.83 |           | 449.10839 |
| 67 | Flavonoid  | Kaempferol-O-hexoside                                    | 24.15 |           | 447.09274 |
| 68 | Flavonoid  | Guaijaverin (Quercetin-3-O-arabinoside)                  | 24.26 |           | 433.07709 |
| 69 | Flavonoid  | Kaempferitrin (Kaempferol-3,7-di-O-rhamnoside)           | 24.31 |           | 577.15573 |
| 70 | Flavonoid  | Quercetin-O-(rhamnosyl)hexoside                          | 24.31 |           | 609.14556 |
| 71 | Flavonoid  | Quercitrin (Quercetin-3-O-rhamnoside)                    | 24.48 | 449.10839 |           |
| 72 | Flavonoid  | Quercetin-O-(acetyl)hexoside isomer 1                    | 24.49 | 507.11387 |           |
| 73 | Flavonoid  | Astragalin (Kaempferol-3-O-glucoside)                    | 24.69 |           | 447.09274 |
| 74 | Flavonoid  | Isorhamnetin-O-hexoside isomer 1                         | 24.75 |           | 477.10330 |
| 75 | Flavonoid  | Kaempferol-3-O-rutinoside (Nicotiflorin)                 | 24.86 |           | 593.15065 |
| 76 | Flavonoid  | Eriodictyol                                              | 24.94 |           | 287.05556 |
| 77 | Flavonoid  | Isorhamnetin-O-hexoside isomer 2                         | 24.95 |           | 477.10330 |
| 78 | Flavonoid  | Isorhamnetin-3-O-rutinoside (Narcissin)                  | 25.21 |           | 623.16122 |
| 79 | Terpenoid  | Abscisic acid                                            | 25.39 |           | 263.12834 |
| 80 | Flavonoid  | Kaempferol-O-(malonyl)glucoside                          | 25.63 |           | 533.09314 |
| 81 | Flavonoid  | Quercetin-O-(acetyl)hexoside isomer 2                    | 25.68 | 507.11387 |           |
| 82 | Flavonoid  | Kaempferol-O-(rhamnosyl)hexoside                         | 26.13 |           | 593.15065 |
| 83 | Flavonoid  | Quercetin-O-(acetyl)hexoside isomer 3                    | 26.29 | 507.11387 |           |
| 84 | Flavonoid  | 2"-O-Acetyl rutin                                        | 26.31 |           | 651.15613 |
| 85 | Flavonoid  | Quercetin-3-O-(4-coumaroyl)glucoside                     | 26.85 |           | 609.12444 |
| 86 | Polyphenol | Di-O-coumaroylglucose isomer 1                           | 27.01 |           | 471.12913 |

|     |                 |                                                                       |       |           |           |
|-----|-----------------|-----------------------------------------------------------------------|-------|-----------|-----------|
| 87  | Flavonoid       | 5,7,3',4',5'-Pentahydroxyflavone (Tricetin)                           | 27.02 |           | 301.03483 |
| 88  | Flavonoid       | Naringenin                                                            | 27.24 |           | 271.06065 |
| 89  | Polyphenol      | Di-O-coumaroylglucose isomer 2                                        | 27.38 |           | 471.12913 |
| 90  | Flavonoid       | Trihydroxy-methoxy(iso)flavanone                                      | 27.38 |           | 301.07122 |
| 91  | Carboxylic acid | Jasmonic acid                                                         | 27.77 |           | 209.11777 |
| 92  | Flavonoid       | Multiflorin A (Kaempferol-3-O-[(6-O-acetyl)glucosyl-(1→4)rhamnoside]) | 28.04 |           | 635.16121 |
| 93  | Flavonoid       | Trihydroxy-methoxyflavone-O-hexoside                                  | 28.37 |           | 461.10839 |
| 94  | Flavonoid       | Tetrahydroxyflavone                                                   | 29.36 |           | 285.03991 |
| 95  | Flavonoid       | Isorhamnetin                                                          | 29.84 |           | 315.05048 |
| 96  | Flavonoid       | Kaempferol-O-[(acetyl)rhamnosyl)rhamnoside]                           | 29.96 |           | 619.16630 |
| 97  | Flavonoid       | Pinocembrin (5,7-Dihydroxyflavanone)                                  | 32.23 |           | 255.06573 |
| 98  | Flavonoid       | Dihydroxy-methoxy(iso)flavanone                                       | 32.25 | 287.09195 |           |
| 99  | Flavonoid       | Dihydroxy-methoxy(iso)flavone                                         | 33.90 |           | 283.06065 |
| 100 | Flavonoid       | Trihydroxy-methoxy(iso)flavone                                        | 34.56 |           | 299.05557 |
| 101 | Fatty acid      | $\alpha$ -Linolenic acid                                              | 44.73 |           | 277.21676 |
| 102 | Fatty acid      | Linoleic acid                                                         | 45.75 |           | 279.23241 |
| 103 | Fatty acid      | Palmitoleic acid                                                      | 46.05 |           | 253.21676 |

Table S4. The phytonutrient profiles of BM-GTE (black mulberry)

| No. | Compound type   | Phytonutrient                                   | RT    | M [+]     | M [-]     |
|-----|-----------------|-------------------------------------------------|-------|-----------|-----------|
| 1   | Amino acid      | Lysine                                          | 1.08  | 147.11336 |           |
| 2   | Alkaloid        | O-Hexosyl-1-deoxynojirimycin                    | 1.08  | 326.14511 |           |
| 3   | Alkaloid        | 1,4-Dideoxy-1,4-iminoarabinitol                 | 1.24  | 134.08172 |           |
| 4   | Amino acid      | Arginine                                        | 1.24  | 175.11951 |           |
| 5   | Carboxylic acid | Quinic acid (metabolite)                        | 1.25  |           | 191.05557 |
| 6   | Alkaloid        | 1-Deoxynojirimycin (Moranoline)                 | 1.29  | 164.09229 |           |
| 7   | Amino acid      | Citrulline                                      | 1.30  | 176.10352 |           |
| 8   | Amino acid      | Proline                                         | 1.30  | 116.07116 |           |
| 9   | Amino acid      | Threonine                                       | 1.31  | 120.06607 |           |
| 10  | Vitamin         | Adenine (B4)                                    | 1.32  | 136.06233 |           |
| 11  | Amino acid      | Asparagine                                      | 1.32  | 133.06132 |           |
| 12  | Amino acid      | Aspartic acid                                   | 1.34  | 134.04534 |           |
| 13  | Carboxylic acid | Citric acid                                     | 1.41  |           | 191.01918 |
| 14  | Vitamin         | Nicotinic acid (Niacin,B3)                      | 1.41  | 124.03986 |           |
| 15  | Vitamin         | Nicotinamide                                    | 1.42  | 123.05584 |           |
| 16  | Amino acid      | Tyrosine                                        | 1.42  | 182.08172 |           |
| 17  | Carboxylic acid | Malic acid                                      | 1.44  |           | 133.01370 |
| 18  | Amino acid      | Isoleucine                                      | 1.54  | 132.10246 |           |
| 19  | Amino acid      | Leucine                                         | 1.81  | 132.10246 |           |
| 20  | Amino acid      | Phenylalanine                                   | 3.23  | 166.08681 |           |
| 21  | Polyphenol      | Protocatechuic acid (3,4-Dihydroxybenzoic acid) | 4.85  |           | 153.01879 |
| 22  | Vitamin         | Pantothenic acid (B5)                           | 5.41  | 220.11850 |           |
| 23  | Amino acid      | Tryptophan                                      | 8.06  | 205.09771 |           |
| 24  | Polyphenol      | Neochlorogenic acid (5-O-Caffeoylquinic acid)   | 8.91  | 355.10291 |           |
| 25  | Polyphenol      | 2,4-Dihydroxybenzoic acid                       | 12.23 |           | 153.01879 |
| 26  | Polyphenol      | 5-O-(4-Coumaroyl)quinic acid                    | 12.59 |           | 337.09235 |
| 27  | Polyphenol      | Chlorogenic acid (3-O-Caffeoylquinic acid)      | 14.23 | 355.10291 |           |
| 28  | Polyphenol      | 1-O-Caffeoylglucose                             | 14.35 |           | 341.08726 |

|    |                 |                                                                    |       |           |           |
|----|-----------------|--------------------------------------------------------------------|-------|-----------|-----------|
| 29 | Polyphenol      | Caffeic acid                                                       | 14.49 |           | 179.03444 |
| 30 | Polyphenol      | 3-O-Feruloylquinic acid                                            | 14.57 |           | 367.10291 |
| 31 | Polyphenol      | trans-Melilotoside (trans-Glucosyl-2-hydroxycinnamate)             | 14.65 |           | 325.09235 |
| 32 | Polyphenol      | Cudranin-di-O-glucoside isomer 1                                   | 15.31 |           | 585.18195 |
| 33 | Polyphenol      | Chryptochlorogenic acid (4-O-Caffeoylquinic acid)                  | 15.59 | 355.10291 |           |
| 34 | Polyphenol      | Coumaroylquinic acid isomer                                        | 16.87 |           | 337.09235 |
| 35 | Polyphenol      | 1-O-Caffeoylquinic acid                                            | 16.98 |           | 353.08726 |
| 36 | Polyphenol      | Cudranin-di-O-glucoside isomer 2                                   | 17.09 |           | 585.18195 |
| 37 | Flavonoid       | Quercetin-di-O-hexoside                                            | 17.18 |           | 625.14048 |
| 38 | Ester           | Ethyl gallate                                                      | 17.36 |           | 197.04500 |
| 39 | Polyphenol      | 4-O-(4-Coumaroyl)quinic acid                                       | 17.54 |           | 337.09235 |
| 40 | Flavonoid       | Quercetin-3-O-rutinoside-7-O-glucoside                             | 17.57 |           | 771.19839 |
| 41 | Polyphenol      | 12-Hydroxyjasmonic acid-12-O-glucoside or Tuberonic acid glucoside | 17.59 |           | 387.16551 |
| 42 | Polyphenol      | Hydroxycoumarin                                                    | 17.75 |           | 161.02387 |
| 43 | Polyphenol      | Cudranin-O-glucoside isomer 1                                      | 17.84 | 407.13421 |           |
| 44 | Polyphenol      | 5-O-Feruloylquinic acid                                            | 17.98 |           | 367.10291 |
| 45 | Carboxylic acid | 12-Hydroxyjasmonic acid                                            | 18.04 |           | 225.11269 |
| 46 | Flavonoid       | Quercetin-O-hexoside-O-(malonyl)hexoside                           | 18.19 |           | 711.14087 |
| 47 | Carboxylic acid | Tuberonic acid                                                     | 18.27 |           | 225.11269 |
| 48 | Polyphenol      | Cudranin-O-glucoside isomer 2                                      | 18.33 | 407.13421 |           |
| 49 | Polyphenol      | 4-O-Feruloylquinic acid                                            | 18.51 |           | 367.10291 |
| 50 | Polyphenol      | Scopoletin                                                         | 18.55 | 193.05009 |           |
| 51 | Vitamin         | Riboflavin (B2)                                                    | 18.60 | 377.14611 |           |
| 52 | Flavonoid       | Kaempferol-O-(rhamnosyl)hexoside-O-hexoside                        | 19.07 |           | 755.20347 |
| 53 | Polyphenol      | 3-O-(4-Coumaroyl)quinic acid                                       | 19.17 |           | 337.09235 |
| 54 | Flavonoid       | Taxifolin (Dihydroquercetin)                                       | 19.34 |           | 303.05048 |
| 55 | Flavonoid       | Kaempferol-O-hexoside-O-(malonyl)hexoside                          | 19.80 |           | 695.14596 |
| 56 | Alkaloid        | Chelidonine                                                        | 20.05 | 354.13415 |           |
| 57 | Flavonoid       | Quercetin-O-(dihexoside)                                           | 20.21 |           | 625.14048 |

|    |                 |                                                           |       |           |           |
|----|-----------------|-----------------------------------------------------------|-------|-----------|-----------|
| 58 | Polyphenol      | Cudranin (Oxyresveratrol, 2,3',4,5'-Tetrahydroxystilbene) | 21.33 | 245.08139 |           |
| 59 | Flavonoid       | Isorhamnetin-3-O-sophoroside                              | 21.83 |           | 639.15613 |
| 60 | Flavonoid       | Dihydrokaempferol (Aromadendrin, Katuranin)               | 21.94 |           | 287.05557 |
| 61 | Flavonoid       | Kaempferol-3-O-rhamnoside-7-O-[rhamnosyl-(1→2)-glucoside] | 22.10 |           | 739.20856 |
| 62 | Polyphenol      | Dicaffeoylquinic acid isomer 1                            | 22.33 |           | 515.11896 |
| 63 | Flavonoid       | Quercetin-3-O-glucuronide                                 | 22.73 |           | 477.06692 |
| 64 | Flavonoid       | Isoquercitrin (Hirsutrin, Quercetin-3-O-glucoside)        | 22.91 |           | 463.08765 |
| 65 | Flavonoid       | Rutin (Quercetin-3-O-rutinoside)                          | 23.02 | 611.16122 |           |
| 66 | Flavonoid       | Reinutrin (Reynoutrin, Quercetin-3-O-xyloside)            | 23.23 |           | 433.07709 |
| 67 | Flavonoid       | Avicularin (Quercetin-3-O-arabinofuranoside, Fencularin)  | 23.51 |           | 433.07709 |
| 68 | Flavonoid       | Quercetin-O-(malonyl)hexoside                             | 23.65 |           | 549.08805 |
| 69 | Other           | Eugenol ( 4-Allyl-2-methoxyphenol)                        | 23.83 | 165.09156 |           |
| 70 | Other           | Lumichrome                                                | 23.90 | 243.08821 |           |
| 71 | Polyphenol      | Dicaffeoylquinic acid isomer 2                            | 24.18 |           | 515.11896 |
| 72 | Flavonoid       | Guaijaverin (rn-3-O-arabinoside)                          | 24.24 |           | 433.07709 |
| 73 | Flavonoid       | Astragalin (Kaempferol-3-O-glucoside)                     | 24.69 |           | 447.09274 |
| 74 | Polyphenol      | Isoliquiritigenin                                         | 24.80 |           | 255.06573 |
| 75 | Flavonoid       | Kaempferol-3-O-rutinoside (Nicotiflorin)                  | 24.84 |           | 593.15065 |
| 76 | Flavonoid       | Isorhamnetin-3-O-glucoside                                | 24.93 | 479.11895 |           |
| 77 | Flavonoid       | Eriodictyol                                               | 24.95 |           | 287.05557 |
| 78 | Flavonoid       | Isorhamnetin-O-hexoside-O-rhamnoside                      | 25.17 |           | 623.16122 |
| 79 | Terpenoid       | Absciscic acid                                            | 25.39 |           | 263.12834 |
| 80 | Flavonoid       | Tetrahydroxyflavanone isomer                              | 25.59 |           | 287.05557 |
| 81 | Flavonoid       | Kaempferol-O-(malonyl)hexoside                            | 25.61 |           | 533.09314 |
| 82 | Polyphenol      | Ethyl caffeate                                            | 25.95 | 209.08139 |           |
| 83 | Flavonoid       | Naringenin                                                | 27.22 |           | 271.06065 |
| 84 | Carboxylic acid | Jasmonic acid                                             | 27.76 |           | 209.11777 |
| 85 | Flavonoid       | Luteolin (3',4',5,7-Tetrahydroxyflavone)                  | 27.86 |           | 285.03992 |
| 86 | Flavonoid       | Methoxy-tetrahydroxy(iso)flavone                          | 28.24 |           | 315.05048 |

|     |            |                                                         |       |           |           |
|-----|------------|---------------------------------------------------------|-------|-----------|-----------|
| 87  | Flavonoid  | Norartocarpetin (2',4',5,7-Tetrahydroxyflavone)         | 28.41 |           | 285.03992 |
| 88  | Ester      | Ethyl 4-hydroxycinnamate                                | 28.68 |           | 191.07082 |
| 89  | Flavonoid  | Kaempferol (3,4',5,7-Tetrahydroxyflavone)               | 29.34 | 287.05557 |           |
| 90  | Flavonoid  | Apigenin                                                | 29.68 |           | 269.04500 |
| 91  | Flavonoid  | Chrysoeriol                                             | 29.89 |           | 299.05556 |
| 92  | Flavonoid  | Liquiritigenin (4',7-Dihydroxyflavanone)                | 29.98 |           | 255.06573 |
| 93  | Flavonoid  | Sakuranetin (4',5-Dihydroxy-7-methoxyflavanone)         | 32.04 | 287.09195 |           |
| 94  | Flavonoid  | Pinocembrin (5,7-Dihydroxyflavanone)                    | 32.24 |           | 255.06573 |
| 95  | Flavonoid  | Kaempferol-O-(cinnamoyl)hexoside                        | 32.27 |           | 577.13461 |
| 96  | Polyphenol | Mornigrol D                                             | 33.44 | 395.18585 |           |
| 97  | Flavonoid  | Acacetin (Linarigenin, 5,7-Dihydroxy-4'-methoxyflavone) | 33.90 | 285.07630 |           |
| 98  | Flavonoid  | Dihydroxy-dimethoxy(iso)flavone isomer 1                | 33.99 | 315.08687 |           |
| 99  | Flavonoid  | Dihydroxy-dimethoxy(iso)flavone isomer 2                | 34.85 | 315.08687 |           |
| 100 | Flavonoid  | Dihydroxy-trimethoxyflavone                             | 34.92 |           | 343.08178 |
| 101 | Flavonoid  | Mornigrol E or Mornigrol F                              | 35.29 | 439.17568 |           |
| 102 | Flavonoid  | Kuwanon G (Albanin F, Moracenin B)                      | 36.38 |           | 691.21794 |
| 103 | Flavonoid  | Kuwanon C (Mulberrin) or Albanin E or Nigrasin H        | 37.64 | 423.18077 |           |
| 104 | Flavonoid  | Apigenin-7,4'-dimethyl ether                            | 38.16 | 299.09195 |           |
| 105 | Flavonoid  | Albafuran A or Albafuran B                              | 38.33 | 379.19094 |           |
| 106 | Flavonoid  | Albafuran A or Albafuran B                              | 38.56 | 379.19094 |           |
| 107 | Flavonoid  | Kuwanon E                                               | 40.00 |           | 423.18077 |
| 108 | Flavonoid  | Kuwanon A or Kuwanon B                                  | 40.87 | 421.16512 |           |
| 109 | Flavonoid  | Chalcomoracin                                           | 40.96 |           | 647.22811 |
| 110 | Flavonoid  | Kuwanon A or Kuwanon B                                  | 41.24 | 421.16512 |           |
| 111 | Flavonoid  | Cyclomorusin (Cyclomulberrochromene)                    | 44.56 |           | 416.12599 |
